# Supplementary material for: Experimental and Computational Study of Novel Pyrazole Azo Dyes as Colored Materials for Light Color Paints
Source: MDPI journal article supplement (doi:10.3390/ma15165507), 2022-08-11
Supplement: s1 [file s1]

# Experimental and computational study of novel pyrazole azo dyes as colored materials for light color paints

Sabina Nitu <sup>1,\*</sup>, Marius Silviu Milea <sup>1,\*</sup>, Sorina Boran <sup>1,\*</sup>, Giannin Mosoarca <sup>1,\*</sup>, Alina D. Zamfir <sup>2,\*</sup>, Simona Popa <sup>1,\*</sup> and Simona Funar-Timofei <sup>3,\*</sup>

<sup>1</sup> Politehnica University of Timisoara, Faculty of Industrial Chemistry and Environmental Engineering, Bd. V. Parvan, No. 6, 300223, Timisoara, Romania;

<sup>2</sup> National Institute for Research and Development in Electrochemistry and Condensed Matter, Plautius An-dronescu Str. 1, 300224, Timisoara, Romania;

<sup>3</sup> "Coriolan Dragulescu" Institute of Chemistry, Romanian Academy, Mihai Viteazul Blvd. No. 24, 300223, Timisoara.

\* Correspondence: sabina.nitu@upt.ro (S.N.); marius.milea@upt.ro (M.S.M.); sorina.boran@upt.ro (S.B); gian-nin.mosoarca@upt.ro (G.M.); alina.zamfir@uav.ro (A.Z.); [simona.popa@upt.ro](mailto:simona.popa@upt.ro) (S.P.); [timofei@acad-icht.tm.edu.ro](mailto:timofei@acad-icht.tm.edu.ro) (S.F-T); Tel.: +40-256-404-231 (S.N.); +40-256-404-232 (M.S.M.), +40-256-404-228 (S.B); +40-256-404-185 (G.M.); +40-256-404-212 (S.P.); +40-256-491-818 (S.F-T.).

## Spectral data of the new azomethylene dyes

### (4a)

diethyl 2-(2-(4-(ethoxycarbonyl)-3-methyl-1H-pyrazol-5-yl)hydrazono)malonate

Orange powder; yield 70.5%; mp 136-138°C

**FT/IR** (KBr disk,  $\nu$  cm<sup>-1</sup>): 3477w; 3353w; 3284w; 3193.5w; 3060.5w; 2986m; 2935w; 2905w; 2835w; 1704s; 1686.4s; 1667sh; 1533s; 1525sh; 1472w; 1450w; 1407m; 1380m; 1346w; 1307.5s; 1265m; 1201.4s; 1157m; 1130s; 1110m; 1056w; 1021m; 876.5w; 805m; 785m; 730w; 700w; 572w; 481w; 447w

**UV-VIS** ( $\lambda_{\max}$ , nm; ethanol,  $\epsilon$ , mol<sup>-1</sup>·dm<sup>3</sup>·cm<sup>-1</sup>): 216 (19430); 239 (12330); 345 (20700)

<sup>1</sup>**H-RMN** ( $\delta$ H ppm, CDCl<sub>3</sub>, 200 MHz): 13.3 (1H, s, HN<sub>Pyr</sub>); 7.5 (1H, b.s, NH-C<sub>5Pyr</sub>); 4.42-4.25 (6H, m, C<sub>4Pyr</sub>-COOCH<sub>2</sub>CH<sub>3</sub>; N=C(COOCH<sub>2</sub>CH<sub>3</sub>)<sub>2</sub>); 2.45(3H, s, C<sub>3Pyr</sub>-CH<sub>3</sub>); 1.42-1.28 (9H, m, C<sub>4Pyr</sub>-COOCH<sub>2</sub>CH<sub>3</sub>; N=C(COOCH<sub>2</sub>CH<sub>3</sub>)<sub>2</sub>);

<sup>13</sup>**C-RMN** ( $\delta$ C ppm, CDCl<sub>3</sub>, 50 MHz) 164.1 (N=C-COOCH<sub>2</sub>CH<sub>3</sub>); 163.5 (N=C-COOCH<sub>2</sub>CH<sub>3</sub>); 162.0 (C<sub>4Pyr</sub>-COOCH<sub>2</sub>CH<sub>3</sub>); 150.4 (C<sub>5Pyr</sub>); 145.8 (C<sub>3Pyr</sub>); 122.9 (N=C(COOCH<sub>2</sub>CH<sub>3</sub>)<sub>2</sub>); 97.7 (C<sub>4Pyr</sub>); 61.7 (N=C(COOCH<sub>2</sub>CH<sub>3</sub>)<sub>2</sub>); 60.5 (C<sub>4Pyr</sub>-COOCH<sub>2</sub>CH<sub>3</sub>); 14.4(C<sub>4Pyr</sub>-COOCH<sub>2</sub>CH<sub>3</sub>); 14.0 (N=C(COOCH<sub>2</sub>CH<sub>3</sub>)<sub>2</sub>); 12.1 (C<sub>3Pyr</sub>-CH<sub>3</sub>).

**MS**: m/z 339.285 (17.8) [M-H]<sup>-</sup>; 293.204 (38.7); 193.914 (7.3); 158.789 (100); 112.442 (38.5); 68.049 (6.2); molecular formula C<sub>14</sub>H<sub>20</sub>N<sub>4</sub>O<sub>6</sub> requires 340.14 [M]<sup>+</sup>.

### (4b)

ethyl 2-(2-(4-(ethoxycarbonyl)-3-methyl-1H-pyrazol-5-yl)hydrazono)-3-oxobutanoate

Yellow powder; yield 75.5%; mp 152-154°C

**FT/IR** (KBr disk,  $\nu$  cm<sup>-1</sup>): 3290m; 3261m; 3196m; 2984w; 2935w; 2904w; 2872w; 1714m; 1679s; 1606m; 1557s; 1476m; 1444w; 1371m; 1317s; 1244m; 1192s; 1175m; 1138s; 1071m; 1053s; 1017w; 945m; 878w; 840w; 784w; 728w; 673w; 448w; 412w

**UV-VIS** ( $\lambda_{\max}$ , nm; ethanol,  $\epsilon$ , mol<sup>-1</sup>·dm<sup>3</sup>·cm<sup>-1</sup>): 235 (11620); 322 (17120)

<sup>1</sup>**H-RMN** ( $\delta$ H ppm, CDCl<sub>3</sub> / DMSO-d<sub>6</sub>, 200 MHz): 10.86 (1H, s, HN<sub>Pyr</sub>); 7.07 (1H, b.s, NH-C<sub>5Pyr</sub>); 4.32 (4H, d q.,  $J = 7$ Hz, C<sub>4Pyr</sub>-COOCH<sub>2</sub>CH<sub>3</sub>; N=C-COOCH<sub>2</sub>CH<sub>3</sub>); 2.44 (3H, s, C<sub>3Pyr</sub>-CH<sub>3</sub>); 2.25 (3H, s, COCH<sub>3</sub>); 1.41-1.32 (6H, d t.,  $J = 6.8-7$ Hz, C<sub>4Pyr</sub>-COOCH<sub>2</sub>CH<sub>3</sub>; N=C-COOCH<sub>2</sub>CH<sub>3</sub>);

<sup>13</sup>**C-RMN** ( $\delta$ C ppm, CDCl<sub>3</sub> / DMSO-d<sub>6</sub>, 50 MHz) 195.5 (COCH<sub>3</sub>); 163.3 (N=C-COOCH<sub>2</sub>CH<sub>3</sub>); 162.5 (C<sub>4Pyr</sub>-COOCH<sub>2</sub>CH<sub>3</sub>); 150.4 (C<sub>5Pyr</sub>); 138.8 (C<sub>3Pyr</sub>); 133.3 (NH-N=C<);

93.13 ( $C_{4Pyr}$ ); 61.2 ( $N=C(COOCH_2CH_3)_2$ ); 59.84 ( $C_{4Pyr}-COOCH_2CH_3$ ); 25.44 ( $COCH_3$ ); 14.48 ( $C_{4Pyr}-COOCH_2CH_3$ ); 14.19 ( $N=C-COOCH_2CH_3$ ); 14.03 ( $C_{3Pyr}-CH_3$ ).

**MS:**  $m/z$  309.232 (34.8)  $[M-H]^-$ ; 291.222 (71.7); 236.135 (69.5); 219.043 (35.3); 128.587 (100); 82.192 (4.2); molecular formula  $C_{13}H_{18}N_4O_5$  requires 310.13  $[M]^+$ .

#### (4c)

3-(2-(4-(ethoxycarbonyl)-3-methyl-1H-pyrazol-5-yl)hydrazono)-2,4-pentandione

Yellow powder; yield 60.5%; mp 140–142°C

**FT/IR** (KBr disk,  $\nu$   $cm^{-1}$ ): 3430sh,w; 3296s; 3191sh,w; 2982w; 2940w; 2872.5w; 2792w; 1692m-s; 1669s; 1603.5m-s; 1557s; 1474m; 1461w; 1445.4w; 1369sh,m; 1357m-i; 1317s; 1240m; 1186s; 1159m-s; 1127s; 1069w-m; 1039w; 1023w; 943m-s; 877w; 782m; 734w; 663.4w; 596w; 517w; 448w; 418.5w

**UV-VIS** ( $\lambda_{max}$ , nm; ethanol,  $\epsilon$ ,  $mol^{-1} \cdot dm^3 \cdot cm^{-1}$ ): 238 (5580); 260 (3720); 331 (7010)

**$^1H$ -RMN** ( $\delta$ H ppm, DMSO- $d_6$ , 200 MHz): 11.98 (1H, b.s,  $HN_{Pyr}$ ); 7.13 (1H, b.s,  $NH-C_{5Pyr}$ ); 4.27 (2H, q,  $J = 6.9$  Hz,  $C_{4Pyr}-COOCH_2CH_3$ ); 2.40 (3H, s,  $COCH_3$ ); 2.35 (3H, s,  $COCH_3$ ); 2.13 (3H, s,  $C_{3Pyr}-CH_3$ ); 1.29 (3H, t,  $J = 6.9$  Hz,  $C_{4Pyr}-COOCH_2CH_3$ );

**$^{13}C$ -RMN** ( $\delta$ C ppm, DMSO- $d_6$ , 50 MHz) 195.3 ( $COCH_3$ ); 162.2 ( $N=C-COOCH_2CH_3$ ); 149.5 ( $C_{5Pyr}$ ); 138.9 ( $C_{3Pyr}$ ); 138.12 ( $NH-N=C(COCH_3)_2$ ); 92.65 ( $C_{4Pyr}$ ); 59.17 ( $C_{4Pyr}-COOCH_2CH_3$ ); 26.57 ( $COCH_3$ ); 24.37 ( $COCH_3$ ); 14.48 ( $C_{4Pyr}-COOCH_2CH_3$ ); 13.79 ( $C_{3Pyr}-CH_3$ ).

**MS:**  $m/z$  279.219 (13.2)  $[M-H]^-$ ; 261.163 (100); 226.735 (15.8); 219.043 (49.8); 188.926 (15.2); 167.837 (21.0); 146.721 (3.4); 98.361 (38.1); 57.968 (8.7); molecular formula  $C_{12}H_{16}N_4O_4$  requires 280.12  $[M]^+$ .

#### (4d)

ethyl 2-(2-(4-(ethoxycarbonyl)-3-methyl-1H-pyrazol-5-yl)hydrazono)-2-benzoylacetate

Yellow powder; yield 62.2%; mp 128–130°C

**FT/IR** (KBr disk,  $\nu$   $cm^{-1}$ ): 3264m; 3270sh,w; 3191w; 2983w-m; 2935w; 2904w; 1720m-s; 1675s; 1605m; 1558s; 1474m; 1446w; 1394w; 1372m; 1323s; 1239m; 1203w; 1181m; 1137sh,m; 1115s; 1073w; 1024w; 949m; 911w; 841w; 785m; 759w; 713.5w-m; 695w; 676w; 409w

**UV-VIS** ( $\lambda_{max}$ , nm; ethanol,  $\epsilon$ ,  $mol^{-1} \cdot dm^3 \cdot cm^{-1}$ ): 236 (12720); 330 (14930)

**$^1H$ -RMN** ( $\delta$ H ppm,  $CDCl_3$ , 200 MHz): 13.1 (1H, s,  $HN_{Pyr}$ ); 10.2 (1H, b.s,  $NH-C_{5Pyr}$ ); 7.8–7.3 (5H, m,  $COC_6H_5$ ); 4.34–4.22 (4H, m,  $C_{4Pyr}-COOCH_2CH_3$ ;  $N=C-COOCH_2CH_3$ ); 2.24 (3H, s,  $C_{3Pyr}-CH_3$ ); 1.31–1.28 (6H, m,  $C_{4Pyr}-COOCH_2CH_3$ ;  $N=C-COOCH_2CH_3$ );

**$^{13}C$ -RMN** ( $\delta$ C ppm,  $CDCl_3$ , 50 MHz) 185.5 ( $COC_6H_5$ ); 163.7 ( $N=C-COOCH_2CH_3$ ); 162.8 ( $C_{4Pyr}-COOCH_2CH_3$ ); 152.8 ( $C_{5Pyr}$ ); 138.9 ( $C_{3Pyr}$ ); 134.2 ( $NH-N=C$ ); 130.1 ( $C_{1Ph}$ ); 128.94 ( $C_{4Ph}$ ); 128.34 ( $C_{3Ph}$ ); 125.9 ( $C_{2Ph}$ ); 93.4 ( $C_{4Pyr}$ ); 62.1 ( $N=C-COOCH_2CH_3$ ); 60.5 ( $C_{4Pyr}-COOCH_2CH_3$ ); 25.44 ( $COCH_3$ ); 14.45 ( $C_{4Pyr}-COOCH_2CH_3$ ); 14.08 ( $N=C-COOCH_2CH_3$ ); 13.92 ( $C_{3Pyr}-CH_3$ ).

**MS:**  $m/z$  371.334 (8.3)  $[M-H]^-$ ; 325.273 (44.9); 267.134 (10.1); 226.053 (7.3); 190.936 (93.7); 144.669 (100); molecular formula  $C_{18}H_{20}N_4O_5$  requires 372.14  $[M]^+$ .

#### (4e)

ethyl 2-(2-(4-(ethoxycarbonyl)-3-methyl-1H-pyrazol-5-yl)hydrazono)-2-pivaloylacetate

Yellowish powder; yield 59%; mp 102–104°C

**FT/IR** (KBr disk,  $\nu$   $cm^{-1}$ ): 3449w-m; 3358w; 3284w; 3194.5w; 3059.5w; 2987w-m; 2880w; 2835w; 1704s; 1686.5s; 1666m-s; 1532s; 1525s; 1472w; 1451w; 1407w; 1381m; 1346w; 1307.5s; 1284w; 12645m; 1201.4s; 1157m-s; 1130s; 1110m-s; 1056m; 1022m; 878.4w; 805w-m; 785m; 730w; 700w; 481w; 447.4w

**UV-VIS** ( $\lambda_{max}$ , nm; ethanol,  $\epsilon$ ,  $mol^{-1} \cdot dm^3 \cdot cm^{-1}$ ): 212 (38560) max local; 230 (23550) max local; 285 (12840); 358 (22780)

**$^1H$ -RMN** ( $\delta$ H ppm, DMSO- $d_6$ , 200 MHz): 12.72 (1H, s,  $HN_{Pyr}$ ); 10.2 (1H, b.s,  $NH-C_{5Pyr}$ ); 4.23–4.28 (4H, m,  $C_{4Pyr}-COOCH_2CH_3$ ;  $N=C-COOCH_2CH_3$ ); 2.45 (3H, s,  $C_{3Pyr}-CH_3$ ); 1.28–1.34 (6H, d. t.,  $J = 6.9$  Hz,  $C_{4Pyr}-COOCH_2CH_3$ ;  $N=C-COOCH_2CH_3$ ); 1.16 (9H, s,  $COC(CH_3)_3$ )

**<sup>13</sup>C-RMN** ( $\delta$ C ppm, DMSO-*d*<sub>6</sub>, 50 MHz): 210.5(CO-C(CH<sub>3</sub>)<sub>3</sub>); 163.8(C<sub>4</sub>Pyr-COOCH<sub>2</sub>CH<sub>3</sub>); 162.7(N=C-COOCH<sub>2</sub>CH<sub>3</sub>); 149.6(C<sub>5</sub>Pyr); 144.1(C<sub>3</sub>Pyr); 133.8(N=C); 97.5(C<sub>4</sub>Pyr); 61.8(N=C-COOCH<sub>2</sub>CH<sub>3</sub>); 60.7(C<sub>4</sub>Pyr-COOCH<sub>2</sub>CH<sub>3</sub>); 41.2(COC(CH<sub>3</sub>)<sub>3</sub>); 26.8(COC(CH<sub>3</sub>)<sub>3</sub>); 14.3(C<sub>4</sub>Pyr-COOCH<sub>2</sub>CH<sub>3</sub>); 14.1(N=C-COOCH<sub>2</sub>CH<sub>3</sub>); 13.4(C<sub>3</sub>Pyr-CH<sub>3</sub>).

#### (4f)

ethyl 2-(2-(4-(ethoxycarbonyl)-3-methyl-1H-pyrazol-5-yl)hydrazono)-2-cyanoacetate

Yellow powder; yield 68.2%; mp 121–123°C (method 1 from ethyl cyanoacetate);

Yellow powder; yield 74.8%; mp 122–124°C (method 2 from ethyl 2-cyanoacetylacetate);

**FT/IR** (KBr disk,  $\nu$  cm<sup>-1</sup>): 3504w; 3363w; 3285m; 3153w; 3135w; 3077w; 2989w-m; 2931w; 2847w; 2209m; 1715.4s; 1600.6s; 1555s; 1538s; 1455w-m; 1403w; 1373w-m; 1309.4s; 1294s; 1233m; 1164.8m-s; 1144m-s; 1101s; 1054m; 1013.4m; 871m; 848w-m; 825w-m; 781m; 763m; 650w; 556.4w-m; 435w

**UV-VIS** ( $\lambda_{\max}$ , nm; ethanol,  $\epsilon$ , mol<sup>-1</sup>·dm<sup>3</sup>·cm<sup>-1</sup>): 216 (37620) max local; 347 (30730)

**<sup>1</sup>H-RMN** ( $\delta$ H ppm, DMSO-*d*<sub>6</sub>, 200 MHz): 13.1 (1H, s, HN<sub>Pyr</sub>); 10.92 (1H, s, NH-C<sub>5</sub>Pyr); 4.38–4.23 (4H, m, C<sub>4</sub>Pyr-COOCH<sub>2</sub>CH<sub>3</sub>; N=C-COOCH<sub>2</sub>CH<sub>3</sub>); 2.42 (3H, s, C<sub>3</sub>Pyr-CH<sub>3</sub>); 1.37–1.29 (6H, m, C<sub>4</sub>Pyr-COOCH<sub>2</sub>CH<sub>3</sub>; N=C-COOCH<sub>2</sub>CH<sub>3</sub>);

**<sup>13</sup>C-RMN** ( $\delta$ C ppm, DMSO-*d*<sub>6</sub>, 50 MHz): 163.6 (C<sub>4</sub>Pyr-COOCH<sub>2</sub>CH<sub>3</sub>); 159.9 (N=C-COOCH<sub>2</sub>CH<sub>3</sub>); 149.7 (C<sub>5</sub>Pyr); 144.3 (C<sub>3</sub>Pyr); 110.1 (C≡N); 107.8 (NH-N=C); 97.9 (C<sub>4</sub>Pyr); 61.8 (C<sub>4</sub>Pyr-COOCH<sub>2</sub>CH<sub>3</sub>); 60.3 (N=C-COOCH<sub>2</sub>CH<sub>3</sub>); 14.08 (C<sub>4</sub>Pyr-COOCH<sub>2</sub>CH<sub>3</sub>; N=C-COOCH<sub>2</sub>CH<sub>3</sub>); 11.14 (C<sub>3</sub>Pyr-CH<sub>3</sub>).

**MS**: *m/z* 292.187 (62.8) [M-H]<sup>-</sup>; 246.102 (19.3); 188.88 (32.0); 132.583 (13.9); 111.425 (100); 65.02 (18); molecular formula C<sub>12</sub>H<sub>15</sub>N<sub>5</sub>O<sub>4</sub> requires 293.11 [M]<sup>+</sup>.

**MS**: *m/z* 293 (52) M<sup>+</sup>; 247 (100); 221 (54); 174 (34); 123 (40); 109 (15); 66 (37); 41 (33); 39 (93); molecular formula C<sub>12</sub>H<sub>15</sub>N<sub>5</sub>O<sub>4</sub> requires 293.11 M<sup>+</sup>.

#### (4g)

ethyl 2-(2-(4-(ethoxycarbonyl)-3-methyl-1H-pyrazol-5-yl)hydrazono)-2-chloroacetate

Yellow powder; yield 72.3 %; mp 187–189°C (method 1 with ethyl 2-chloroacetylacetate)

**FT/IR** (KBr disk,  $\nu$  cm<sup>-1</sup>): 3509.8w-m; 3372w; 3283w-m; 3193.5w; 3136.7w; 3076w; 3022w; 2987w-m; 2918w-m; 2857w; 1730sh; 1713.4s; 1674s; 1572.7sh; 1548.6s; 1476m; 1454m-s; 1419m; 1389m; 1370m; 1344m; 1298s; 1281.5s; 1157s; 1137s; 1069m; 1022m; 867w; 806m; 787m; 752m; 656w; 582.4w; 513w; 487w

**UV-VIS** ( $\lambda_{\max}$ , nm; ethanol,  $\epsilon$ , mol<sup>-1</sup>·dm<sup>3</sup>·cm<sup>-1</sup>): 220 (12440) max local; 237 (10120) max local; 312 (18860)

**<sup>1</sup>H-RMN** ( $\delta$ H ppm, DMSO-*d*<sub>6</sub>, 200 MHz): 12.82 (1H, s, HN<sub>Pyr</sub>); 9.93 (1H, s, NH-C<sub>5</sub>Pyr); 4.39 (2H, q, *J* = 7Hz, N=C-COOCH<sub>2</sub>CH<sub>3</sub>); 4.26 (2H, q, *J* = 7Hz, C<sub>4</sub>Pyr-COOCH<sub>2</sub>CH<sub>3</sub>); 2.41 (3H, s, C<sub>3</sub>Pyr-CH<sub>3</sub>); 1.41–1.29 (6H, m, C<sub>4</sub>Pyr-COOCH<sub>2</sub>CH<sub>3</sub>; N=C-COOCH<sub>2</sub>CH<sub>3</sub>); obs. There is no graph of the proton spectrum!

**<sup>13</sup>C-RMN** ( $\delta$ C ppm, DMSO-*d*<sub>6</sub>, 50 MHz) 164.01 (C<sub>4</sub>Pyr-COOCH<sub>2</sub>CH<sub>3</sub>); 158.77 (N=C-COOCH<sub>2</sub>CH<sub>3</sub>); 150.68 (C<sub>5</sub>Pyr); 144.03 (C<sub>3</sub>Pyr); 117.53 (C<sub>4</sub>Pyr); 96.31 (NH-N=C); 62.51 (C<sub>4</sub>Pyr-COOCH<sub>2</sub>CH<sub>3</sub>); 59.94 (N=C-COOCH<sub>2</sub>CH<sub>3</sub>); 14.14 (C<sub>4</sub>Pyr-COOCH<sub>2</sub>CH<sub>3</sub>); 14.05 (N=C-COOCH<sub>2</sub>CH<sub>3</sub>); 11.36 (C<sub>3</sub>Pyr-CH<sub>3</sub>).

**MS**: *m/z* 301.71 (4.3) [M-H]<sup>-</sup>; 267.587 (100); 193.26 (15.2); 165.057 (25.4); 146.922 (12.6); molecular formula C<sub>11</sub>H<sub>15</sub>ClN<sub>4</sub>O<sub>4</sub> requires 302.08 M<sup>+</sup>.

**MS**: *m/z* 304 (16); 302 (5) ratio 3.2:1; 258 (18); 256 (57); 221 (27); 149 (33); 123 (37); 67 (35); 66 (100); molecular formula C<sub>11</sub>H<sub>15</sub>ClN<sub>4</sub>O<sub>4</sub> requires 302.08 M<sup>+</sup> *m/z*: 302.08 (100.0%), 304.08 (32.0%) ratio 3.125:1

**(4h)**

1-(2-(4-(ethoxycarbonyl)-3-methyl-1H-pyrazol-5-yl)hydrazono)-1-phenylacetone

Yellow-orange powder; yield 63.7%; mp 145–147°C

**FT/IR** (KBr disk,  $\nu$   $\text{cm}^{-1}$ ): 3313s; 3186m; 3090m; 2980m; 2932m; 2904m; 2867w; 1889w; 1707m; 1671s; 1609s; 1580s; 1563s; 1321m; 1237m; 1189s; 1063m; 944m; 780w; 656w**UV-VIS** ( $\lambda_{\text{max}}$ , nm; ethanol,  $\epsilon$ ,  $\text{mol}^{-1}\cdot\text{dm}^3\cdot\text{cm}^{-1}$ ): 223 (34720); 293 (11530) cu umăr la 305 (10600); 359 (22310) **$^1\text{H}$ -RMN** ( $\delta\text{H}$  ppm, DMSO- $d_6$ , 200 MHz): 11.2 (1H,  $\text{HN}_{\text{Pyr}}$ ); 7.83–7.86 (2H, d,  $J = 7.5\text{Hz}$ ,  $\text{HC}_{2\text{Ph}}$ ); 7.40–7.59 (3H, m,  $\text{HC}_{3,4\text{Ph}}$ ); 4.26 (2H, q,  $J = 6.9\text{Hz}$ ,  $\text{C}_{4\text{Pyr}}\text{-COOCH}_2\text{CH}_3$ ); 2.36 (3H, s,  $\text{C}_{3\text{Pyr}}\text{-CH}_3$ ); 1.88 (3H, s,  $\text{N}=\text{C-COCH}_3$ ); 1.30 (3H, t,  $J = 6.9\text{Hz}$ ,  $\text{C}_{4\text{Pyr}}\text{-COOCH}_2\text{CH}_3$ ) **$^{13}\text{C}$ -RMN** ( $\delta\text{C}$  ppm, DMSO- $d_6$ , 50 MHz) 200.5 ( $\text{N}=\text{C}(\text{Ph})\text{-COCH}_3$ ); 162.59 ( $\text{C}_{4\text{Pyr}}\text{-COOCH}_2\text{CH}_3$ ); 149.35 ( $\text{C}_{5\text{Pyr}}$ ); 142.36 ( $\text{C}_{3\text{Pyr}}$ ); 139.92 ( $\text{NH-N}=\text{C}$ ); 135.33 ( $\text{C}_{1,\text{Ph}}$ ); 129.93–127.97 ( $\text{C}_{2-4,\text{Ph}}$ ); 90.82 ( $\text{C}_{4\text{Pyr}}$ ); 58.84 ( $\text{C}_{4\text{Pyr}}\text{-COOCH}_2\text{CH}_3$ ); 25.21 ( $\text{N}=\text{C}(\text{Ph})\text{-COCH}_3$ ); 14.54 ( $\text{C}_{4\text{Pyr}}\text{-COOCH}_2\text{CH}_3$ ); 13.93 ( $\text{C}_{3\text{Pyr}}\text{-CH}_3$ ).**MS**:  $m/z$  314 (16)  $\text{M}^+$ ; 299 (18); 296 (56); 252 (16); 251 (42); 250 (71); 249 (76); 225 (22); 224 (27); 211 (46); 165 (23); 152 (15); 123 (17); 116 (78); 115 (100); 103; 90; 78; 65 (21); molecular formula  $\text{C}_{16}\text{H}_{18}\text{N}_4\text{O}_3$  requires 314.14  $\text{M}^+$ .**Table S1.** Hydrogen bond properties of the azo and hydrazone energy optimized tautomers of the new azomethylene dyes.\*

| Azo dye tautomer                                                                                                                                                                                                                                                     | Hydrazone dye tautomer                                                                                                                                                                                                                                                                                                                                                                                                                      |
|----------------------------------------------------------------------------------------------------------------------------------------------------------------------------------------------------------------------------------------------------------------------|---------------------------------------------------------------------------------------------------------------------------------------------------------------------------------------------------------------------------------------------------------------------------------------------------------------------------------------------------------------------------------------------------------------------------------------------|
| 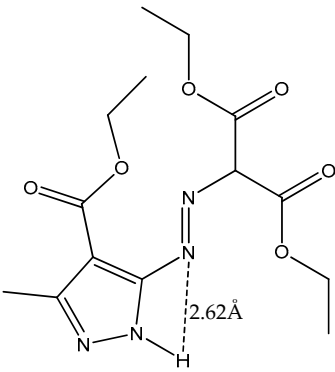 <p>4a1</p> <p><math>d_{\text{H-N}\cdots\text{N}} = 2.35\text{Å}</math></p> <p>NHN angle = <math>63.39^\circ</math></p> <p>H-bond energy = <math>-0.20\text{ kcal/mol}</math></p> |  <p>4a2</p> <p><math>d_{\text{N(H)}\cdots\text{O(=C)}} = 2.86\text{ Å}</math></p> <p><math>d_{\text{NH}\cdots\text{O(C)}} = 2.67\text{ Å}</math></p> <p>NHO(=) angle = <math>121.1^\circ</math></p> <p>NHO(&lt;) angle = <math>120.79^\circ</math></p> <p>three-centre (bifurcated donor)</p> <p>H-bond energy = <math>-0.45\text{ kcal/mol}</math></p> |

|                                                                                                |                                                                                                                                                                                                                                                             |
|------------------------------------------------------------------------------------------------|-------------------------------------------------------------------------------------------------------------------------------------------------------------------------------------------------------------------------------------------------------------|
| 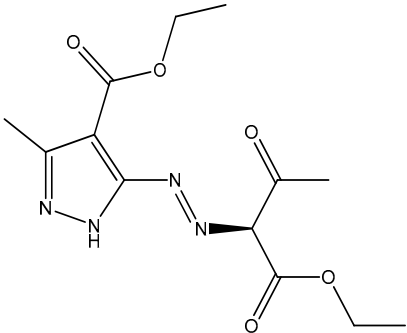 <p>4b1</p>   |  <p>4b2</p> <p><math>d_{N(H)...O} = 2.58 \text{ \AA}</math></p> <p>NHO angle = <math>124.03^\circ</math></p> <p>H-bond energy = <math>-0.33 \text{ kcal/mol}</math></p>   |
|  <p>4c1</p>  |  <p>4c2</p> <p><math>d_{N(H)...O} = 2.83 \text{ \AA}</math></p> <p>NHO angle = <math>116.53^\circ</math></p> <p>H-bond energy = <math>-0.19 \text{ kcal/mol}</math></p>  |
|  <p>4d1</p> |  <p>4d2</p> <p><math>d_{N(H)...O} = 2.66 \text{ \AA}</math></p> <p>NHO angle = <math>124.87^\circ</math></p> <p>H-bond energy = <math>-0.33 \text{ kcal/mol}</math></p> |

|                                                                                                                                                                                                                 |                                                                                                                                                                                                                     |
|-----------------------------------------------------------------------------------------------------------------------------------------------------------------------------------------------------------------|---------------------------------------------------------------------------------------------------------------------------------------------------------------------------------------------------------------------|
| 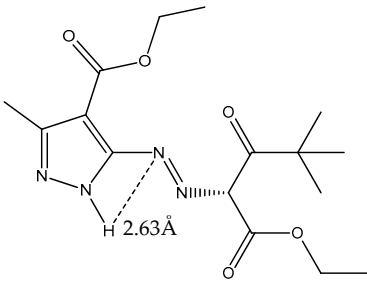 <p><b>4e1</b><br/> <math>d_{(H)N...N}=2.35\text{\AA}</math><br/> NHN angle= 63.16°<br/> H-bond energy = -0.21 kcal/mol</p>    |  <p><b>4e2</b><br/> <math>d_{N(H)...O} = 2.87\text{\AA}</math><br/> NHO angle = 119.79°<br/> H-bond energy = -0.21 kcal/mol</p>   |
|  <p><b>4f1</b></p>                                                                                                            |  <p><b>4f2</b><br/> <math>d_{N(H)...O} = 2.67\text{\AA}</math><br/> NHO angle = 123.91°<br/> H-bond energy = -0.29 kcal/mol</p>  |
|  <p><b>4g1</b><br/> <math>d_{(H)N...N}=2.42\text{\AA}</math><br/> NHN angle = 61.66°<br/> H-bond energy = -0.25 kcal/mol</p> |  <p><b>4g2</b><br/> <math>d_{N(H)...O} = 2.80\text{\AA}</math><br/> NHO angle = 120.69°<br/> H-bond energy = -0.21 kcal/mol</p> |

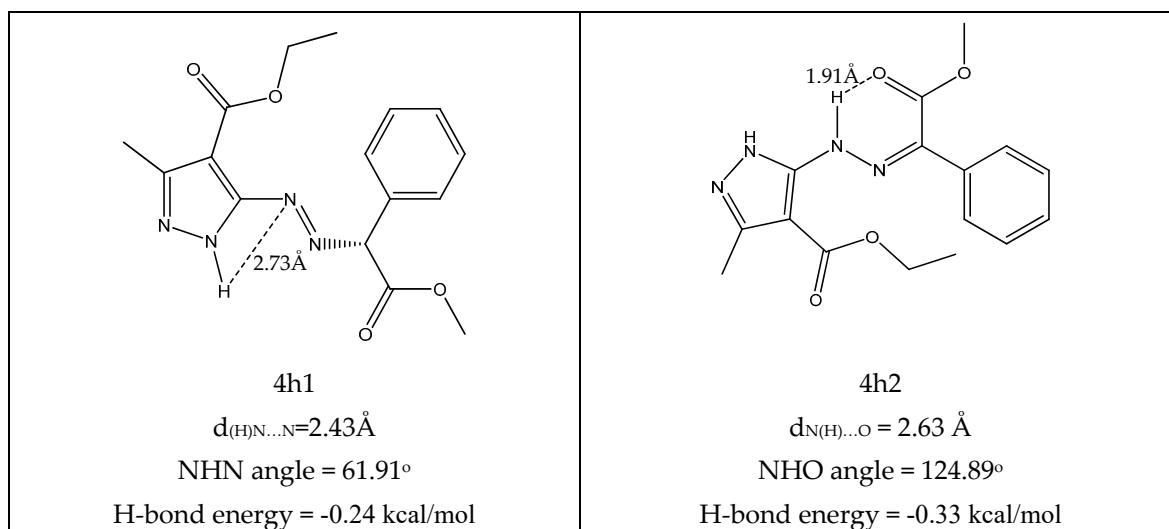

\* N – H .... A, (A= acceptor: O or N) and donor-acceptor ( $d_{N(H)...O}$  and  $d_{(H)N...N}$ ) hydrogen bond lengths (expressed in Ångström, Å); NHN and NHO-hydrogen bond angles; H-bond -hydrogen bond; H-bond energies were calculated using the CHARMM force field evaluated by the VEGA ZZ v. 3.0.1 software [1].

**Table S2.** Computed data obtained using molecular mechanics and quantum chemical (B3LYP) calculations for the energy minimized azomethylene dye tautomers.\*

| Dye | Tautomer  | EMMFF94s<br>(kcal/mol) | B3LYP               |                           |       |       |                           |                           |           |           |       |        |
|-----|-----------|------------------------|---------------------|---------------------------|-------|-------|---------------------------|---------------------------|-----------|-----------|-------|--------|
|     |           |                        | E(RB3LYP)<br>(a.u.) | ZPE<br>(Hartree/Particle) | Hcorr | Gcorr | E <sub>HOMO</sub><br>(eV) | E <sub>LUMO</sub><br>(eV) | η<br>(eV) | μ<br>(eV) | ω     | σ      |
| 4a1 | azo       | 16.88                  | -1216.180           | 0.348                     | 0.376 | 0.287 | -0.249                    | -0.090                    | -0.079    | -0.169    | 0.181 | 12.639 |
| 4a2 | hydrazone | 89.19                  | -1216.214           | 0.350                     | 0.377 | 0.290 | -0.231                    | -0.082                    | -0.074    | -0.156    | 0.165 | 13.480 |
| 4b1 | azo       | 21.01                  | -1101.603           | 0.315                     | 0.340 | 0.256 | -0.252                    | -0.097                    | -0.077    | -0.174    | 0.197 | 12.917 |
| 4b2 | hydrazone | 82.51                  | -1101.640           | 0.316                     | 0.340 | 0.260 | -0.234                    | -0.096                    | -0.069    | -0.165    | 0.197 | 14.451 |
| 4c1 | azo       | 24.27                  | -987.023            | 0.281                     | 0.303 | 0.228 | -0.249                    | -0.103                    | -0.073    | -0.176    | 0.211 | 13.680 |
| 4c2 | hydrazone | 75.54                  | -987.062            | 0.282                     | 0.305 | 0.231 | -0.241                    | -0.108                    | -0.067    | -0.174    | 0.227 | 14.988 |
| 4d1 | azo       | 58.73                  | -1293.378           | 0.368                     | 0.396 | 0.305 | -0.248                    | -0.097                    | -0.076    | -0.172    | 0.196 | 13.204 |
| 4d2 | hydrazone | 127.24                 | -1293.417           | 0.369                     | 0.397 | 0.308 | -0.231                    | -0.091                    | -0.070    | -0.161    | 0.186 | 14.336 |
| 4e1 | azo       | 35.43                  | -1219.570           | 0.399                     | 0.428 | 0.337 | -0.247                    | -0.092                    | -0.078    | -0.169    | 0.185 | 12.877 |
| 4e2 | hydrazone | 97.4                   | -1219.604           | 0.400                     | 0.429 | 0.338 | -0.229                    | -0.086                    | -0.071    | -0.157    | 0.173 | 14.008 |
| 4f1 | azo       | 25.24                  | -1041.176           | 0.276                     | 0.299 | 0.220 | -0.268                    | -0.110                    | -0.079    | -0.189    | 0.226 | 12.643 |
| 4f2 | hydrazone | 87.48                  | -1041.215           | 0.278                     | 0.300 | 0.224 | -0.239                    | -0.101                    | -0.069    | -0.170    | 0.209 | 14.483 |
| 4g1 | azo       | 42.03                  | -1408.542           | 0.269                     | 0.291 | 0.213 | -0.269                    | -0.114                    | -0.078    | -0.191    | 0.236 | 12.881 |
| 4g2 | hydrazone | 92.46                  | -1408.572           | 0.269                     | 0.292 | 0.215 | -0.232                    | -0.080                    | -0.076    | -0.156    | 0.159 | 13.148 |
| 4h1 | azo       | 64.23                  | -1140.703           | 0.330                     | 0.355 | 0.272 | -0.252                    | -0.095                    | -0.079    | -0.174    | 0.192 | 12.720 |
| 4h2 | hydrazone | 103.26                 | -1140.733           | 0.331                     | 0.356 | 0.276 | 0.000                     | -0.083                    | -0.067    | -0.150    | 0.168 | 14.863 |

\* E<sub>MMFF94s</sub> – MMFF94s energy; E(RB3LYP) – calculated total energy (one Hartree = 627.509 kcal mol<sup>-1</sup>); ZPE - unscaled zero-point correction; Hcorr - thermal correction to the enthalpy; Gcorr - thermal correction to the Gibbs free energy; E<sub>HOMO</sub> and E<sub>LUMO</sub> – highest occupied and lowest unoccupied molecular orbital energies, respectively; μ-electronic chemical potential; η-chemical hardness; ω-electrophilicity; σ-softness.



**Table S3.** Experimental (Exp) and calculated  $^{13}\text{C}$  and  $^1\text{H}$  chemical shift values of the azomethylene dyes.\*

| Dye | Tautomer  | Exp $^{13}\text{C}$<br>chemical shifts<br>for the<br>Pyr-NH-N=C</<br>Pyr-N=N-CH<<br>moiety (ppm) | Calculated $^{13}\text{C}$<br>chemical shifts<br>for the<br>Pyr-NH-N=C</<br>Pyr-N=N-CH<<br>moiety (ppm) | Exp $^1\text{H}$<br>chemical shifts<br>for the<br>Pyr-NH-N=C<<br>group (ppm) | Calculated $^1\text{H}$<br>chemical shifts<br>for the<br>Pyr-NH-N=C<<br>group (ppm) | Exp $^{13}\text{C}$<br>chemical shifts<br>for the<br>C <sub>Pyr</sub> -NH-N=C</<br>C <sub>Pyr</sub> -N=N-CH<<br>moiety (ppm) | Calculated $^{13}\text{C}$<br>chemical shifts<br>for the<br>C <sub>Pyr</sub> -NH-N=C</<br>C <sub>Pyr</sub> -N=N-CH<<br>moiety (ppm) |
|-----|-----------|--------------------------------------------------------------------------------------------------|---------------------------------------------------------------------------------------------------------|------------------------------------------------------------------------------|-------------------------------------------------------------------------------------|------------------------------------------------------------------------------------------------------------------------------|-------------------------------------------------------------------------------------------------------------------------------------|
| 4a1 | hydrazone | 122.9                                                                                            | 131.61 (CHCl <sub>3</sub> )**                                                                           | 7.5                                                                          | 11.16 (CHCl <sub>3</sub> )**                                                        | 150.4                                                                                                                        | 154.54 (CHCl <sub>3</sub> )**                                                                                                       |
| 4a2 | azo       |                                                                                                  | 92.71 (CHCl <sub>3</sub> )**                                                                            |                                                                              |                                                                                     |                                                                                                                              | 161.79 (CHCl <sub>3</sub> )**                                                                                                       |
| 4b1 | hydrazone | 133.3                                                                                            | 131.97 (CHCl <sub>3</sub> )**<br>132.29 (DMSO)**                                                        | 7.07                                                                         | 14.06 (CHCl <sub>3</sub> )**<br>17.48 (DMSO)**                                      | 150.43                                                                                                                       | 154.54 (CHCl <sub>3</sub> )**<br>149.41 (DMSO)**                                                                                    |
| 4b2 | azo       |                                                                                                  | 105.47 (CHCl <sub>3</sub> )**<br>105.33 (DMSO)**                                                        |                                                                              |                                                                                     |                                                                                                                              | 161.72 (CHCl <sub>3</sub> )**<br>156.17 (DMSO)**                                                                                    |
| 4c1 | hydrazone | 138.12                                                                                           | 139.43 (DMSO)**                                                                                         | 7.13                                                                         | 14.27 (DMSO)**                                                                      | 149.5                                                                                                                        | 150.79 (DMSO)**                                                                                                                     |
| 4c2 | azo       |                                                                                                  | 113.88 (DMSO)**                                                                                         |                                                                              |                                                                                     |                                                                                                                              | 162.58 (DMSO)**                                                                                                                     |
| 4d1 | hydrazone | 134.2                                                                                            | 135.82 (CHCl <sub>3</sub> )**                                                                           | 10.2                                                                         | 12.39 (CHCl <sub>3</sub> )**                                                        | 152.8                                                                                                                        | 151.36 (CHCl <sub>3</sub> )**                                                                                                       |
| 4d2 | azo       |                                                                                                  | 95.95 (CHCl <sub>3</sub> )**                                                                            |                                                                              |                                                                                     |                                                                                                                              | 162.77 (CHCl <sub>3</sub> )**                                                                                                       |
| 4e1 | hydrazone | 133.8                                                                                            | 137.11 (DMSO)**                                                                                         | 10.2                                                                         | 12.41 (DMSO)**                                                                      | 149.6                                                                                                                        | 154.75 (DMSO)**                                                                                                                     |
| 4e2 | azo       |                                                                                                  | 94.48 (DMSO)**                                                                                          |                                                                              |                                                                                     |                                                                                                                              | 162.85 (DMSO)**                                                                                                                     |
| 4f1 | hydrazone | 107.8                                                                                            | 112.70 (DMSO)**                                                                                         | 10.92                                                                        | 13.06 (DMSO)**                                                                      | 149.7                                                                                                                        | 153.55 (DMSO)**                                                                                                                     |
| 4f2 | azo       |                                                                                                  | 74.35 (DMSO)**                                                                                          |                                                                              |                                                                                     |                                                                                                                              | 158.99 (DMSO)**                                                                                                                     |
| 4g1 | hydrazone | 117.53                                                                                           | 127.31 (DMSO)**                                                                                         | 9.93                                                                         | 8.88 (DMSO)**                                                                       | 150.68                                                                                                                       | 150.94 (DMSO)**                                                                                                                     |
| 4g2 | azo       |                                                                                                  | 89.68 (DMSO)**                                                                                          |                                                                              |                                                                                     |                                                                                                                              | 157.33 (DMSO)**                                                                                                                     |
| 4h1 | hydrazone | 139.92                                                                                           | 138.61 (DMSO)**                                                                                         | -                                                                            | 12.55 (DMSO)**                                                                      | 149.35                                                                                                                       | 152.61 (DMSO)**                                                                                                                     |
| 4h2 | azo       |                                                                                                  | 95.66 (DMSO)**                                                                                          |                                                                              |                                                                                     |                                                                                                                              | 156.96 (DMSO)**                                                                                                                     |

\* Pyr – pyrazole ring; the chemical shifts are calculated for the highlighted carbon and hydrogen atoms included in the mentioned groups. \*\* Solvent used (in paranthesis): DMSO-dimethylsulfoxide, CHCl<sub>3</sub>-chlorophorm.

**Table S4.** Experimental UV-VIS spectra of the azomethylene dyes in ethanol.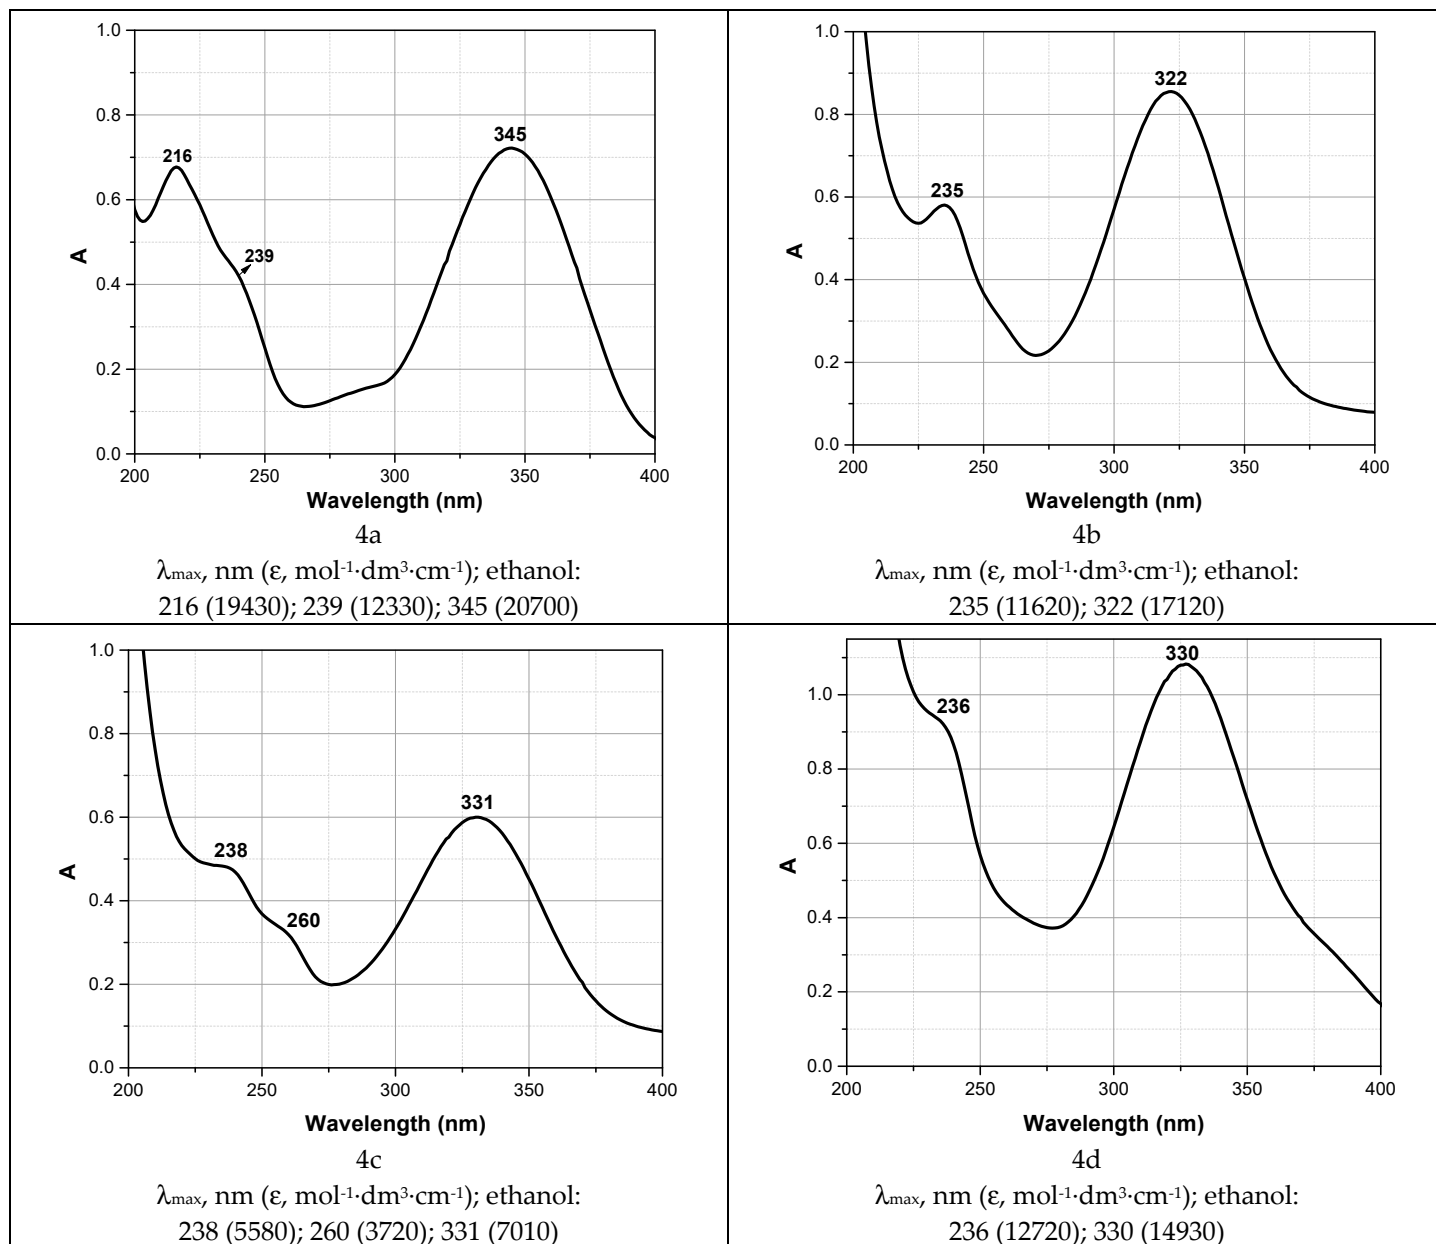

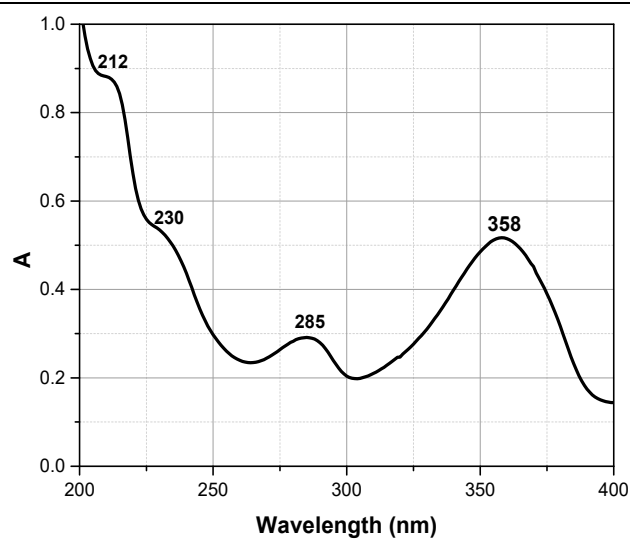

$\lambda_{\text{max}}$ , nm ( $\epsilon$ , mol<sup>-1</sup>·dm<sup>3</sup>·cm<sup>-1</sup>); ethanol:  
212 (38560); 230 (23550); 285 (12840); 358 (22780)

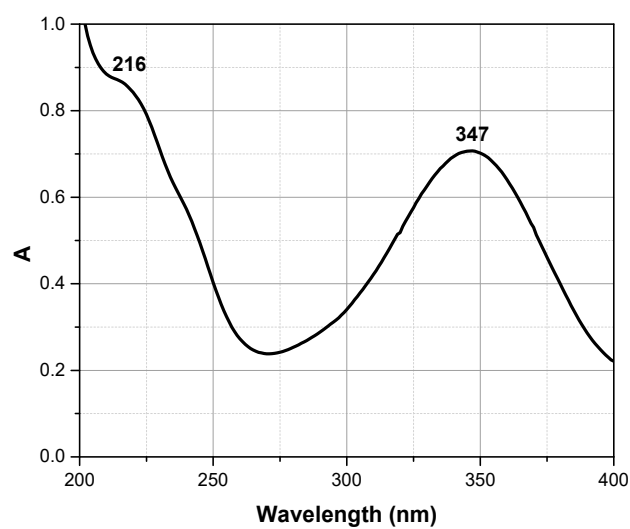

$\lambda_{\text{max}}$ , nm ( $\epsilon$ , mol<sup>-1</sup>·dm<sup>3</sup>·cm<sup>-1</sup>); ethanol:  
216 (37620); 347 (30730)

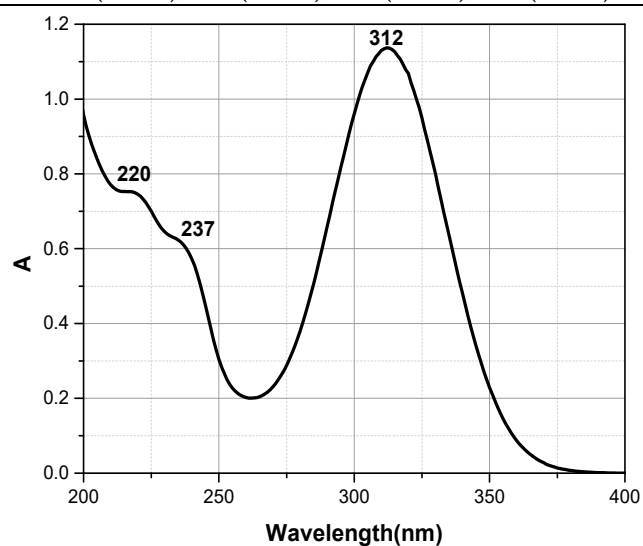

$\lambda_{\text{max}}$ , nm ( $\epsilon$ , mol<sup>-1</sup>·dm<sup>3</sup>·cm<sup>-1</sup>); ethanol:  
220 (12440); 237 (10120); 312 (18860)

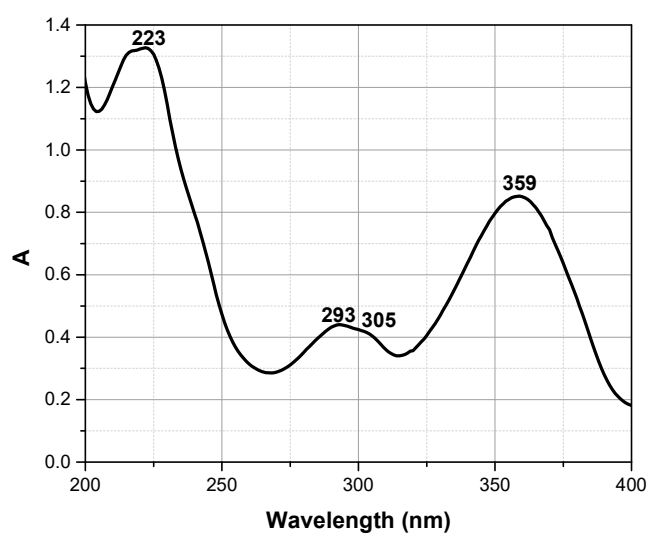

$\lambda_{\text{max}}$ , nm ( $\epsilon$ , mol<sup>-1</sup>·dm<sup>3</sup>·cm<sup>-1</sup>); ethanol:  
223 (34720); 293 (11530); 305 (10600); 359 (22310)

**Table S5.** Experimental and calculated UV-VIS absorption maxima ( $\lambda_{\max}$ , in parantheses) and their corresponding oscillator strength values of the azomethylene dyes obtained using the CIS, TD and ZINDO methods and B3LYP functional.

| Dye | Tautomer | Method | Oscillator strength<br>( $\lambda_{\max}$ , nm) |                        |                        |                        |                        |                        |                        |                        | Experimental<br>Wavelength (nm) |
|-----|----------|--------|-------------------------------------------------|------------------------|------------------------|------------------------|------------------------|------------------------|------------------------|------------------------|---------------------------------|
|     |          |        | S1*                                             | S2*                    | S3*                    | S4*                    | S5*                    | S6*                    | S7*                    | S8*                    |                                 |
| 4a1 | azo      | CIS    | 0.004<br>(358.06)                               | 0.488<br>(222.77)      | 0.298<br>(191.98)      | 0.002<br>(183.37)      | 0.002<br>(180.64)      | 0.003<br>(179.08)      | 0.023<br>(157.83)      | 0.492<br>(155.43)      | 216                             |
| 4a2 | hydrazo  | CIS    | 0.982<br>(240.06)                               | 0.025<br>(223.3)       | 0.002<br>(187.63)      | 0.030<br>(182.54)      | 0.443<br>(175.93)      | 0.001<br>(172.17)      | 0.033<br>(170.19)      | 0.391<br>(157.68)      | 239<br>(local maximum)          |
| 4a1 | azo      | TD     | 0.009<br>(423.65)                               | 0.105<br>(308.4)       | 0.311<br>(293.48)      | 0.005<br>(286.16)      | 0.001<br>(269.21)      | 0.010<br>(257.18)      | 0.011<br>(243.46)      | 0.031<br>(238.93)      | 345                             |
|     |          | TD**   | 0.002**<br>(481.15)**                           | 0.003**<br>(283.45)**  | 0.030**<br>(249.87)**  | 0.001**<br>(245.83)**  | 0.355**<br>(223.89)**  | 0.004**<br>(211.90)**  | 0.016**<br>(209.07)**  | 0.106**<br>(203.56)**  |                                 |
| 4a2 | hydrazo  | TD     | 0.556<br>(344.99)                               | 0.001<br>(302.04)      | 0.021<br>(281.85)      | 0.000<br>(260.47)      | 0.002<br>(254.15)      | 0.207<br>(240.96)      | 0.012<br>(235.47)      | 0.020<br>(231.69)      |                                 |
|     |          | TD**   | 0.001**<br>(303.08)**                           | 0.004**<br>(276.07)**  | 0.0006**<br>(271.71)** | 0.718**<br>(246.21)**  | 0.071**<br>(226.41)**  | 0.019**<br>(191.49)**  | 0.002**<br>(187.57)**  | 0.022**<br>(186.37)**  |                                 |
| 4a1 | azo      | ZINDO  | 0.004<br>(460.32)                               | 0.147<br>(334.21)      | 0.080<br>(325.73)      | 0.062<br>(318.22)      | 0.001<br>(312.93)      | 0.129<br>(288.72)      | 0.016<br>(245.32)      | 0.055<br>(234.63)      |                                 |
| 4a2 | hydrazo  | ZINDO  | 0.002<br>(364.45)                               | 0.033<br>(346.73)      | 0.493<br>(336.04)      | 0.001<br>(320.9)       | 0.027<br>(294.99)      | 0.088<br>(267.39)      | 0.010<br>(253.98)      | 0.404<br>(235.78)      |                                 |
| 4b1 | azo      | CIS    | 0.003<br>(363.04)                               | 0.099<br>(235.11)      | 0.459<br>(226.16)      | 0.311<br>(194.76)      | 0.001<br>(183.59)      | 0.001<br>(183.26)      | 0.032 (158.5)          | 0.584<br>(155.23)      | 235                             |
| 4b2 | hydrazo  | CIS    | 0.003<br>(269.09)                               | 0.933<br>(258.87)      | 0.002<br>(209.56)      | 0.000<br>(186.95)      | 0.295<br>(178.86)      | 0.000<br>(173.88)      | 0.079 (172.3)          | 0.323<br>(164.24)      | 322                             |
| 4b1 | azo      | TD     | 0.004<br>(429.4)                                | 0.325<br>(326.05)      | 0.049<br>(303.23)      | 0.022<br>(288.55)      | 0.105<br>(281.53)      | 0.011<br>(273.27)      | 0.007<br>(259.93)      | 0.008<br>(244.12)      |                                 |
|     |          | TD**   | 0.0016**<br>(488.16)**                          | 0.0016**<br>(321.73)** | 0.0029**<br>(287.58)** | 0.0296**<br>(253.46)** | 0.4195**<br>(229.79)** | 0.0153**<br>(209.74)** | 0.0615**<br>(207.58)** | 0.0472**<br>(202.69)** |                                 |
| 4b2 | hydrazo  | TD     | 0.001<br>(377.58)                               | 0.594<br>(361.9)       | 0.029<br>(301.1)       | 0.000<br>(291.58)      | 0.000<br>(279.41)      | 0.047 (246.8)          | 0.000<br>(242.82)      | 0.183<br>(239.35)      |                                 |
|     |          | TD**   | 0.0004**<br>(406.47)**                          | 0.0008**<br>(295.48)** | 0.0004**<br>(273.82)** | 0.7239**<br>(259.72)** | 0.0018**<br>(240.24)** | 0.0155**<br>(201.77)** | 0.0007**<br>(198.11)** | 0.000**<br>(195.61)**  |                                 |

|     |         |       |                        |                        |                        |                        |                        |                        |                        |                        |                        |
|-----|---------|-------|------------------------|------------------------|------------------------|------------------------|------------------------|------------------------|------------------------|------------------------|------------------------|
| 4b1 | azo     | ZINDO | 0.002<br>(470.57)      | 0.003<br>(368.89)      | 0.210<br>(337.06)      | 0.083<br>(328.29)      | 0.035<br>(321.06)      | 0.133<br>(293.34)      | 0.016<br>(255.15)      | 0.022<br>(244.2)       |                        |
| 4b2 | hydrazo | ZINDO | 0.001<br>(498.56)      | 0.503<br>(366.86)      | 0.001<br>(355.03)      | 0.001<br>(327.64)      | 0.004<br>(318.48)      | 0.102 (265.3)          | 0.003<br>(263.16)      | 0.253<br>(242.14)      |                        |
| 4c1 | azo     | CIS   | 0.004<br>(368.04)      | 0.128<br>(238.32)      | 0.019<br>(234.15)      | 0.389<br>(223.96)      | 0.314<br>(194)         | 0.001<br>(183.08)      | 0.105 (159.5)          | 0.491<br>(156.22)      | 238<br>(local maximum) |
| 4c2 | hydrazo | CIS   | 0.012<br>(273.32)      | 0.961<br>(263.21)      | 0.001<br>(240.49)      | 0.002<br>(205.29)      | 0.261<br>(178.66)      | 0.014<br>(176.12)      | 0.054 (172.3)          | 0.383<br>(164.2)       | 260<br>(local maximum) |
| 4c1 | azo     | TD    | 0.017<br>(436.84)      | 0.259<br>(342.93)      | 0.032<br>(306.3)       | 0.030<br>(303.95)      | 0.006<br>(290.61)      | 0.136<br>(282.12)      | 0.012<br>(272.65)      | 0.005<br>(268.03)      | 331                    |
|     |         | TD**  | 0.0026**<br>(496.76)** | 0.0025**<br>(326.19)** | 0.0023**<br>(319.29)** | 0.0026**<br>(286.96)** | 0.4136**<br>(233.49)** | 0.0149**<br>(211.20)** | 0.0273**<br>(208.24)** | 0.0449**<br>(204.70)** |                        |
| 4c2 | hydrazo | TD    | 0.001<br>(405)         | 0.575<br>(365.55)      | 0.001<br>(338.97)      | 0.030<br>(304.97)      | 0.002<br>(275.59)      | 0.000<br>(265.47)      | 0.158<br>(248.11)      | 0.016<br>(245.49)      |                        |
|     |         | TD**  | 0.0003**<br>(418.83)** | 0.000**<br>(367.40)**  | 0.0032**<br>(271.86)** | 0.7118**<br>(263.68)** | 0.0041**<br>(246.23)** | 0.0003**<br>(208.74)** | 0.0053**<br>(193.04)** | 0.0137**<br>(191.14)** |                        |
| 4c1 | azo     | ZINDO | 0.004<br>(472.96)      | 0.009<br>(380.49)      | 0.002<br>(372.15)      | 0.156<br>(335.17)      | 0.147<br>(326.2)       | 0.133<br>(291.99)      | 0.017<br>(259.88)      | 0.014<br>(246.26)      |                        |
| 4c2 | hydrazo | ZINDO | 0.001<br>(500.95)      | 0.000<br>(431.68)      | 0.540<br>(376.48)      | 0.001<br>(327.11)      | 0.007<br>(317.82)      | 0.055<br>(269.46)      | 0.111<br>(263.21)      | 0.126<br>(241.69)      |                        |
| 4d1 | azo     | CIS   | 0.003<br>(362.83)      | 0.044<br>(247.81)      | 0.392<br>(226.33)      | 0.139<br>(220.34)      | 0.288<br>(217.35)      | 0.295<br>(193.15)      | 0.001<br>(183.58)      | 0.008<br>(178.27)      | 236<br>(local maximum) |
| 4d2 | hydrazo | CIS   | 0.592<br>(248.71)      | 0.319<br>(246.77)      | 0.049<br>(223.03)      | 0.257<br>(215.54)      | 0.080<br>(214.94)      | 0.151<br>(182.68)      | 0.285<br>(176.36)      | 0.405<br>(175.86)      | 330                    |
| 4d1 | azo     | TD    | 0.006<br>(438.73)      | 0.112<br>(346.35)      | 0.049<br>(317.72)      | 0.008<br>(314.77)      | 0.107<br>(307.84)      | 0.020<br>(297.15)      | 0.026<br>(296.79)      | 0.169<br>(293.06)      |                        |
|     |         | TD**  | 0.0021**<br>(488.37)** | 0.0019**<br>(368.78)** | 0.0028**<br>(285.99)** | 0.0013**<br>(245.02)** | 0.3605**<br>(230.78)** | 0.019**<br>(214.45)**  | 0.0194**<br>(212.75)** | 0.0229**<br>(210.61)** |                        |
| 4d2 | hydrazo | TD    | 0.534<br>(358.11)      | 0.012<br>(344.67)      | 0.070<br>(307.38)      | 0.005<br>(299.46)      | 0.003<br>(292.94)      | 0.064<br>(290.09)      | 0.015<br>(289.34)      | 0.009<br>(267.15)      |                        |
|     |         | TD**  | 0.0006**<br>(389.08)** | 0.0066**<br>(312.83)** | 0.0005**<br>(271.37)** | 0.7190**<br>(252.52)** | 0.0267**<br>(227.72)** | 0.0463**<br>(208.89)** | 0.0013**<br>(204.55)** | 0.0088**<br>(199.98)** |                        |
| 4d1 | azo     | ZINDO | 0.003<br>(462.83)      | 0.005<br>(419.87)      | 0.111<br>(334.69)      | 0.164<br>(326.09)      | 0.001<br>(312.59)      | 0.117<br>(288.27)      | 0.027<br>(278.44)      | 0.211<br>(265.5)       |                        |

|     |         |       |                        |                        |                        |                        |                        |                        |                        |                        |                        |
|-----|---------|-------|------------------------|------------------------|------------------------|------------------------|------------------------|------------------------|------------------------|------------------------|------------------------|
| 4d2 | hydrazo | ZINDO | 0.003<br>(425.52)      | 0.023<br>(392.2)       | 0.473<br>(354.61)      | 0.001<br>(324.84)      | 0.028<br>(297.9)       | 0.024<br>(277.83)      | 0.234<br>(266.21)      | 0.111<br>(265.14)      |                        |
| 4e1 | azo     | CIS   | 0.003<br>(360.64)      | 0.033<br>(243.6)       | 0.446<br>(221.51)      | 0.300<br>(191.02)      | 0.001<br>(182.47)      | 0.003<br>(178.35)      | 0.022<br>(157.16)      | 0.460<br>(156.6)       | 212<br>(local maximum) |
| 4e2 | hydrazo | CIS   | 0.001<br>(251.81)      | 0.886<br>(245.84)      | 0.055<br>(220.41)      | 0.007<br>(180.54)      | 0.444<br>(176.29)      | 0.000<br>(172.73)      | 0.040<br>(170.45)      | 0.287<br>(159.42)      | 230<br>(local maximum) |
| 4e1 | azo     | TD    | 0.008<br>(429.92)      | 0.114<br>(344.91)      | 0.049<br>(309.6)       | 0.230<br>(292.1)       | 0.017<br>(289.19)      | 0.001<br>(273.44)      | 0.013<br>(264.67)      | 0.014<br>(245.3)       | 285                    |
|     |         | TD**  | 0.0028**<br>(484.70)** | 0.003**<br>(329.60)**  | 0.0029**<br>(283.46)** | 0.0032**<br>(244.74)** | 0.3374**<br>(231.52)** | 0.0321**<br>(213.18)** | 0.0137**<br>(211.24)** | 0.0252**<br>(207.81)** | 358                    |
| 4e2 | hydrazo | TD    | 0.004<br>(357.49)      | 0.592<br>(351.97)      | 0.014<br>(285.37)      | 0.012<br>(284.32)      | 0.001<br>(264.41)      | 0.029<br>(260.41)      | 0.037<br>(257.37)      | 0.156<br>(239.08)      |                        |
|     |         | TD**  | 0.0003**<br>(368.36)** | 0.0114**<br>(307.64)** | 0.0004**<br>(270.67)** | 0.7370**<br>(249.82)** | 0.0398**<br>(226.19)** | 0.0014**<br>(201.53)** | 0.0019**<br>(189.38)** | 0.0145**<br>(187.32)** |                        |
| 4e1 | azo     | ZINDO | 0.004<br>(458.55)      | 0.005<br>(385.97)      | 0.103<br>(332.56)      | 0.166<br>(323.07)      | 0.001<br>(315.66)      | 0.119<br>(286.02)      | 0.010<br>(249.05)      | 0.031<br>(243.84)      |                        |
| 4e2 | hydrazo | ZINDO | 0.002<br>(412.81)      | 0.025<br>(390.79)      | 0.446<br>(349.31)      | 0.001<br>(326.03)      | 0.014<br>(297.74)      | 0.092<br>(268.37)      | 0.011 (255.7)          | 0.274<br>(239.04)      |                        |
| 4f1 | azo     | CIS   | 0.001<br>(355.02)      | 0.683<br>(234.9)       | 0.213<br>(205.31)      | 0.001<br>(186.37)      | 0.003<br>(177.99)      | 0.003<br>(169.43)      | 0.011<br>(165.43)      | 0.029<br>(158.8)       | 216<br>(local maximum) |
| 4f2 | hydrazo | CIS   | 1.021<br>(259.71)      | 0.003<br>(227.73)      | 0.003<br>(181.48)      | 0.208<br>(180.55)      | 0.001<br>(178.4)       | 0.000<br>(173.57)      | 0.013<br>(173.53)      | 0.000<br>(173.53)      | 347                    |
| 4f1 | azo     | TD    | 0.001<br>(429.85)      | 0.067<br>(321.21)      | 0.003<br>(316.75)      | 0.531<br>(294.92)      | 0.019<br>(275.88)      | 0.028<br>(286.02)      | 0.002<br>(251.25)      | 0.000<br>(238.87)      |                        |
|     |         | TD**  | 0.0003**<br>(476.63)** | 0.0005**<br>(303.12)** | 0.0031**<br>(241.17)** | 0.5049**<br>(226.47)** | 0.0184**<br>(216.19)** | 0.0372**<br>(215.68)** | 0.0945**<br>(211.46)** | 0.1364**<br>(204.58)** |                        |
| 4f2 | hydrazo | TD    | 0.656<br>(359.97)      | 0.028<br>(303.49)      | 0.000<br>(296.39)      | 0.000<br>(278.99)      | 0.175<br>(240.67)      | 0.000<br>(237.15)      | 0.022<br>(236.11)      | 0.110<br>(226.64)      |                        |
|     |         | TD**  | 0.0003**<br>(313.98)** | 0.0005**<br>(275.43)** | 0.8270**<br>(257.02)** | 0.0043**<br>(228.01)** | 0.0002**<br>(200.71)** | 0.0347**<br>(198.82)** | 0.0256**<br>(192.14)** | 0.0507**<br>(185.89)** |                        |
| 4f1 | azo     | ZINDO | 0.001<br>(459.21)      | 0.003<br>(338.83)      | 0.434<br>(329.99)      | 0.002<br>(317.16)      | 0.094<br>(310.54)      | 0.009<br>(246.77)      | 0.003<br>(235.97)      | 0.175<br>(228.9)       |                        |
| 4f2 | hydrazo | ZINDO | 0.000<br>(399.15)      | 0.506<br>(366.71)      | 0.001<br>(326.54)      | 0.009<br>(297.45)      | 0.100<br>(266.84)      | 0.012<br>(263.33)      | 0.236<br>(242.94)      | 0.000<br>(239.96)      |                        |

|     |         |       |                        |                        |                        |                        |                        |                        |                        |                        |                             |
|-----|---------|-------|------------------------|------------------------|------------------------|------------------------|------------------------|------------------------|------------------------|------------------------|-----------------------------|
| 4g1 | azo     | CIS   | 0.000<br>(359.27)      | 0.758<br>(239.91)      | 0.228<br>(207.65)      | 0.005<br>(189.18)      | 0.001<br>(185.17)      | 0.014<br>(167.81)      | 0.002<br>(163.87)      | 0.018<br>(162.09)      | 220<br>(local maximum)      |
| 4g2 | hydrazo | CIS   | 1.081<br>(228.15)      | 0.000<br>(192.31)      | 0.005<br>(190.74)      | 0.001<br>(175.78)      | 0.294<br>(173.62)      | 0.033<br>(168.12)      | 0.003<br>(164.19)      | 0.564<br>(156.14)      | 237<br>(local maximum)      |
| 4g1 | azo     | TD    | 0.000<br>(443.98)      | 0.090<br>(331.02)      | 0.001<br>(310.43)      | 0.385<br>(306.95)      | 0.128<br>(297.52)      | 0.001<br>(267.87)      | 0.053<br>(264.07)      | 0.001<br>(254.34)      | 312                         |
|     |         | TD**  | 0.000**<br>(500.97)**  | 0.0004**<br>(305.50)** | 0.0194**<br>(270.83)** | 0.5865**<br>(232.64)** | 0.0250**<br>(223.69)** | 0.0291**<br>(219.40)** | 0.0711**<br>(218.22)** | 0.0331**<br>(217.45)** |                             |
| 4g2 | hydrazo | TD    | 0.653<br>(325.87)      | 0.028<br>(267.85)      | 0.000<br>(264.61)      | 0.000<br>(245.62)      | 0.095<br>(236.64)      | 0.000<br>(224.33)      | 0.000<br>(222.28)      | 0.091<br>(220.07)      |                             |
|     |         | TD**  | 0.0004**<br>(287.54)** | 0.0003**<br>(271.31)** | 0.8588**<br>(235.23)** | 0.0053**<br>(206.42)** | 0.004**<br>(181.50)**  | 0.0349**<br>(179.87)** | 0.0081**<br>(179.43)** | 0.0851**<br>(176.82)** |                             |
| 4h1 | azo     | CIS   | 0.000<br>(359.12)      | 0.852<br>(229.92)      | 0.005<br>(204.18)      | 0.024<br>(201.04)      | 0.211<br>(198.37)      | 0.001<br>(183.15)      | 0.002<br>(182.24)      | 0.291<br>(176.79)      | 223                         |
| 4h2 | hydrazo | CIS   | 1.027<br>(262.39)      | 0.007<br>(223.51)      | 0.009<br>(208.69)      | 0.069<br>(203.1)       | 0.015<br>(184.28)      | 0.124<br>(177.69)      | 0.003<br>(174.92)      | 0.520<br>(172.12)      | 293 with shoulder<br>at 305 |
| 4h1 | azo     | TD    | 0.001<br>(434.08)      | 0.076<br>(330.75)      | 0.005<br>(318.37)      | 0.127<br>(308.12)      | 0.422<br>(291.69)      | 0.018<br>(287.58)      | 0.022<br>(265.15)      | 0.002<br>(251.05)      | 359                         |
|     |         | TD**  | 0.001**<br>(483.64)**  | 0.0004**<br>(294.43)** | 0.0118**<br>(251.23)** | 0.4526**<br>(223.37)** | 0.3047**<br>(212.76)** | 0.0075**<br>(207.19)** | 0.0583**<br>(206.48)** | 0.0479**<br>(202.50)** |                             |
| 4h2 | hydrazo | TD    | 0.630<br>(368.13)      | 0.002<br>(296.44)      | 0.022<br>(287.56)      | 0.015<br>(279.72)      | 0.008<br>(278.6)       | 0.264<br>(252.72)      | 0.001<br>(252.45)      | 0.012<br>(248.58)      |                             |
|     |         | TD**  | 0.0038**<br>(311.21)** | 0.0009**<br>(270.50)** | 0.9073**<br>(257.62)** | 0.0050**<br>(225.69)** | 0.0008**<br>(199.95)** | 0.0178**<br>(187.49)** | 0.1079**<br>(184.93)** | 0.0066**<br>(183.72)** |                             |
| 4h1 | azo     | ZINDO | 0.001<br>(457.85)      | 0.003<br>(336.77)      | 0.535<br>(329.1)       | 0.001<br>(315.84)      | 0.123<br>(306.07)      | 0.025<br>(289.67)      | 0.000<br>(271.62)      | 0.009<br>(255.15)      |                             |
| 4h2 | hydrazo | ZINDO | 0.016<br>(395.31)      | 0.538<br>(365.64)      | 0.001<br>(323.32)      | 0.014<br>(293.69)      | 0.001<br>(276.46)      | 0.136<br>(270.76)      | 0.108<br>(265.41)      | 0.020<br>(255.43)      |                             |

\* Excited states. \*\* TD results obtained using the M06-2X functional.

**Table S6.** Experimental MS spectra of the azomethylene dyes.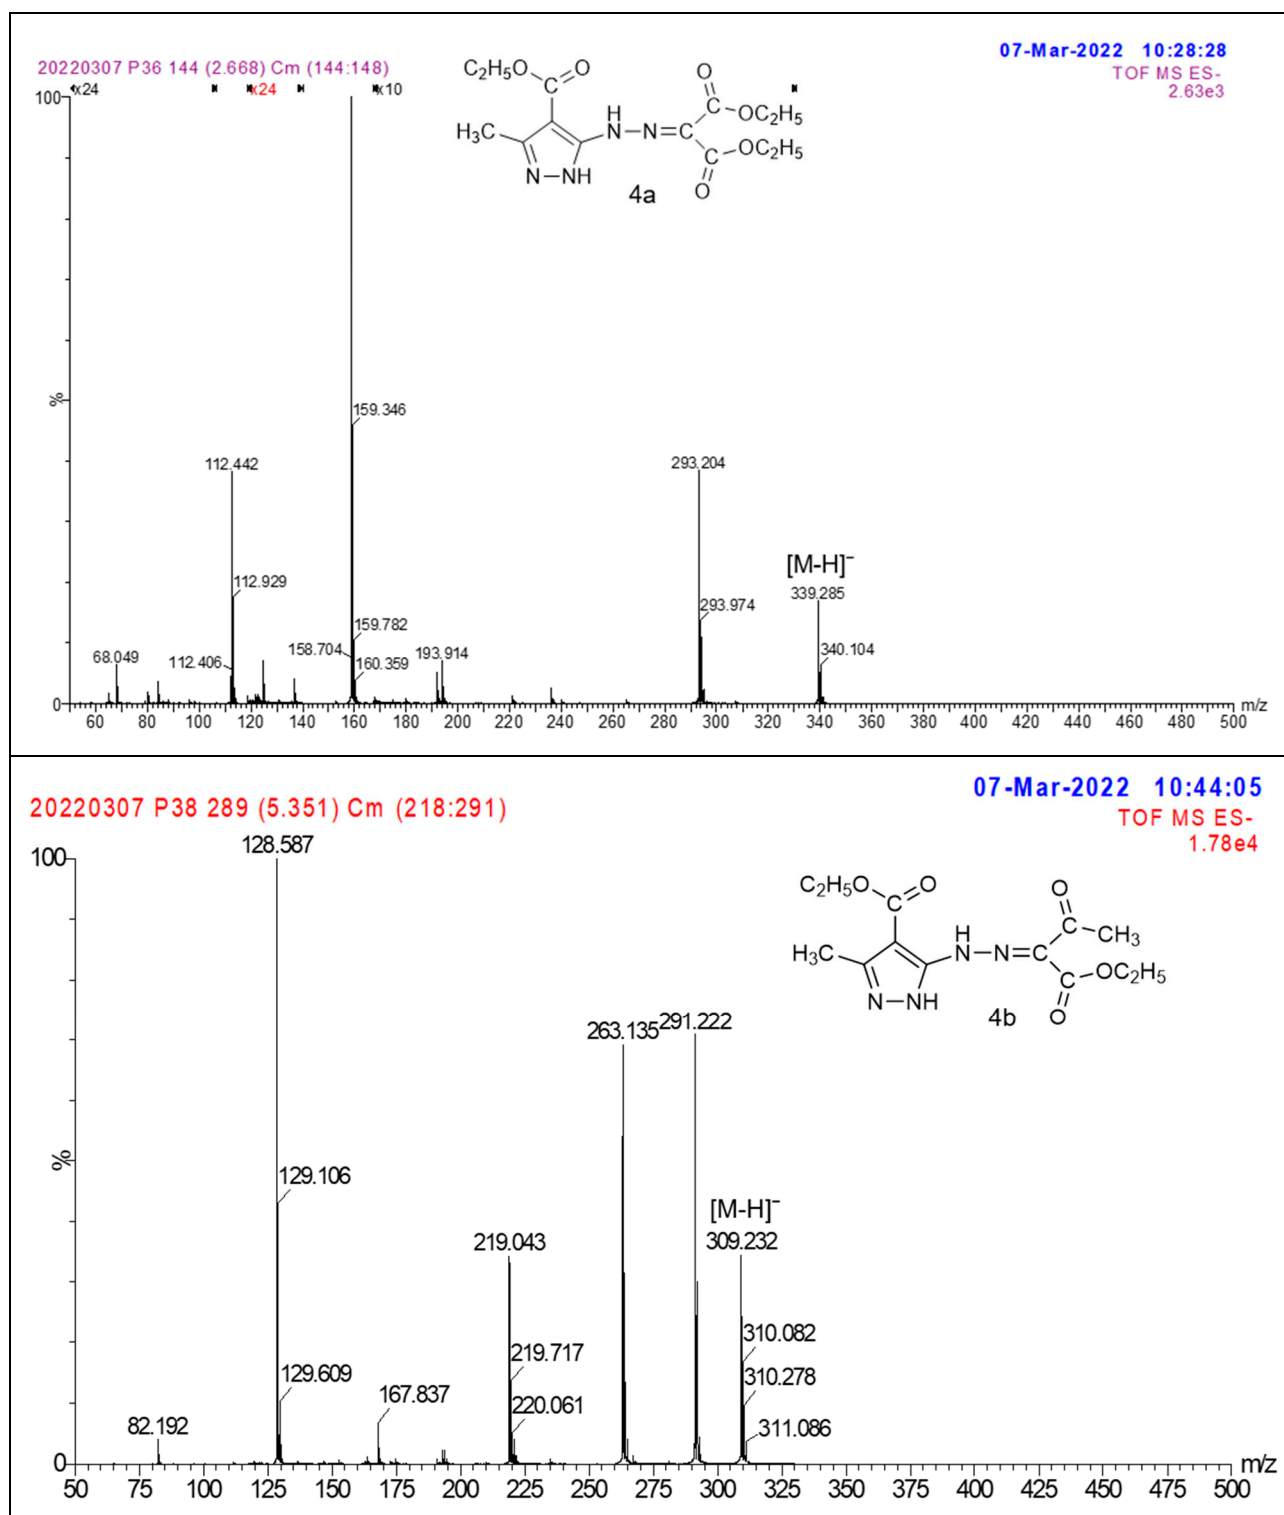



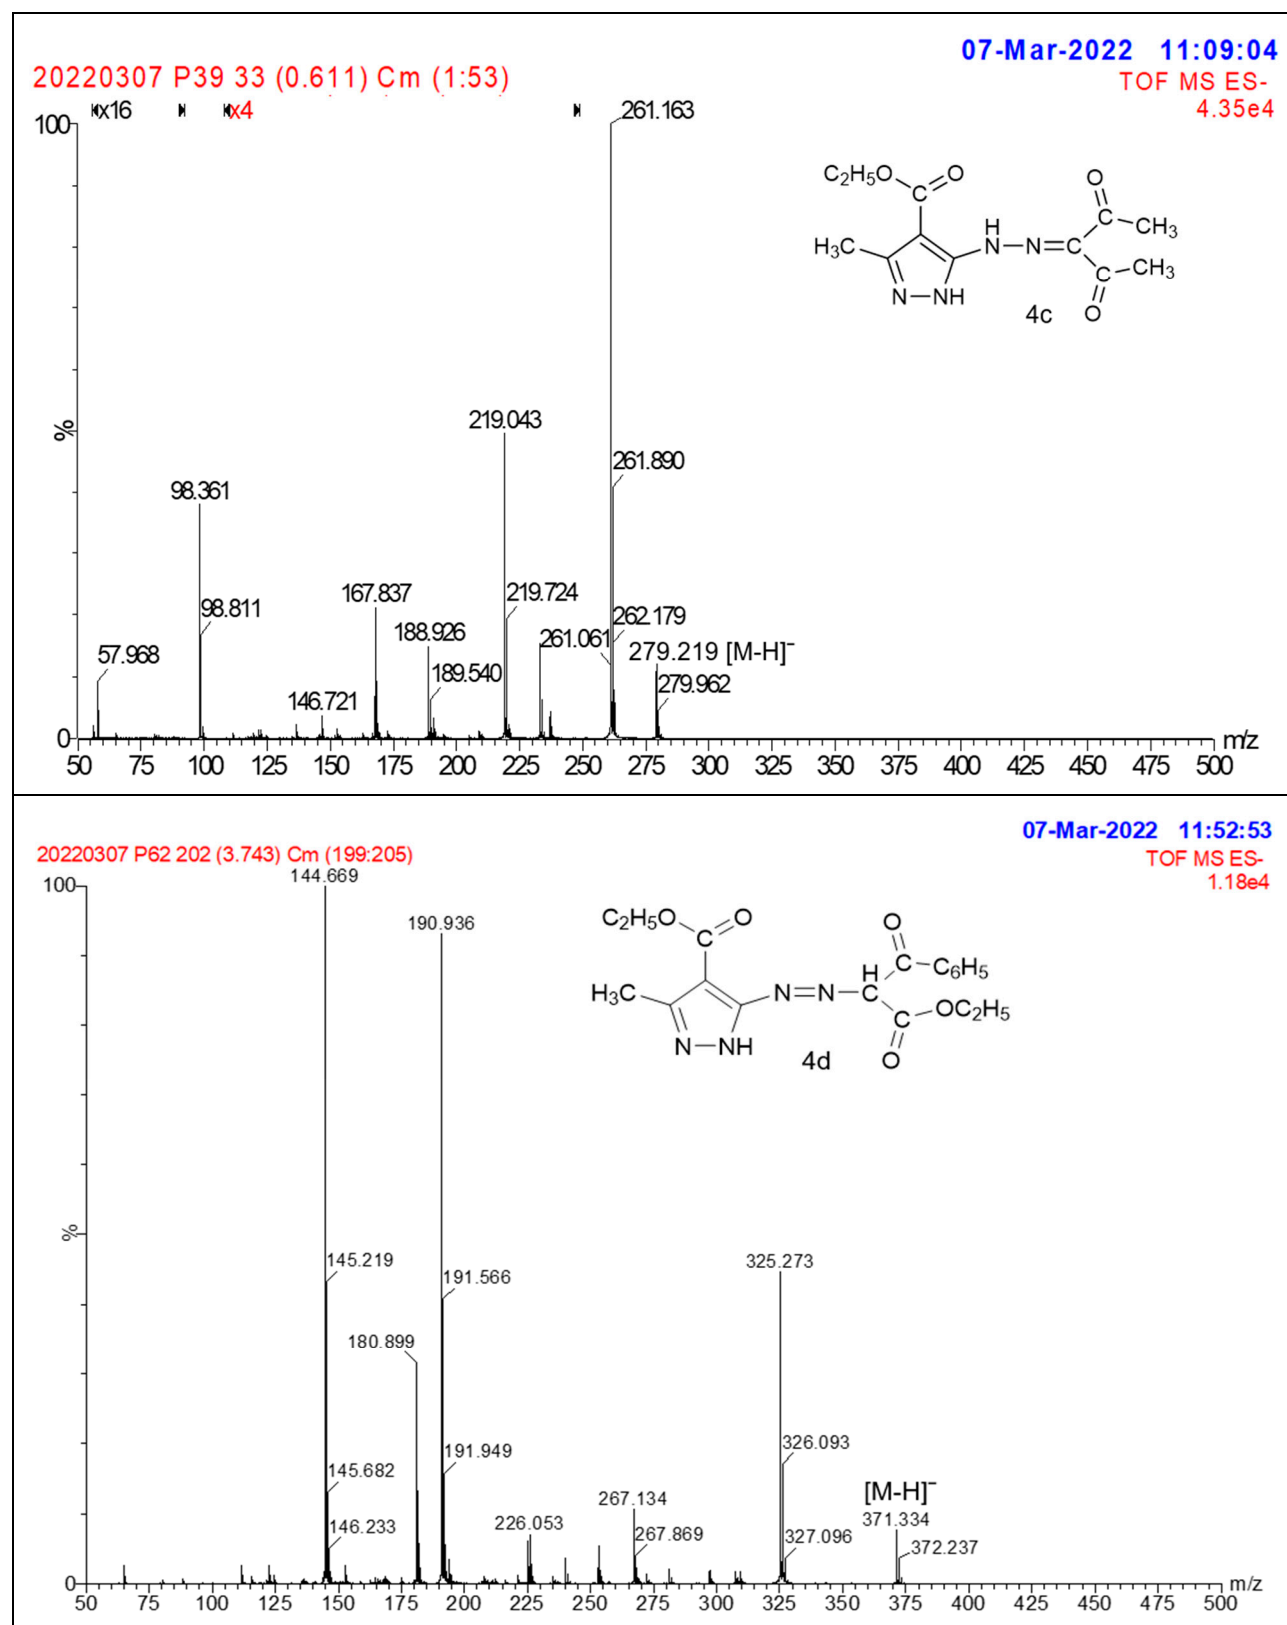

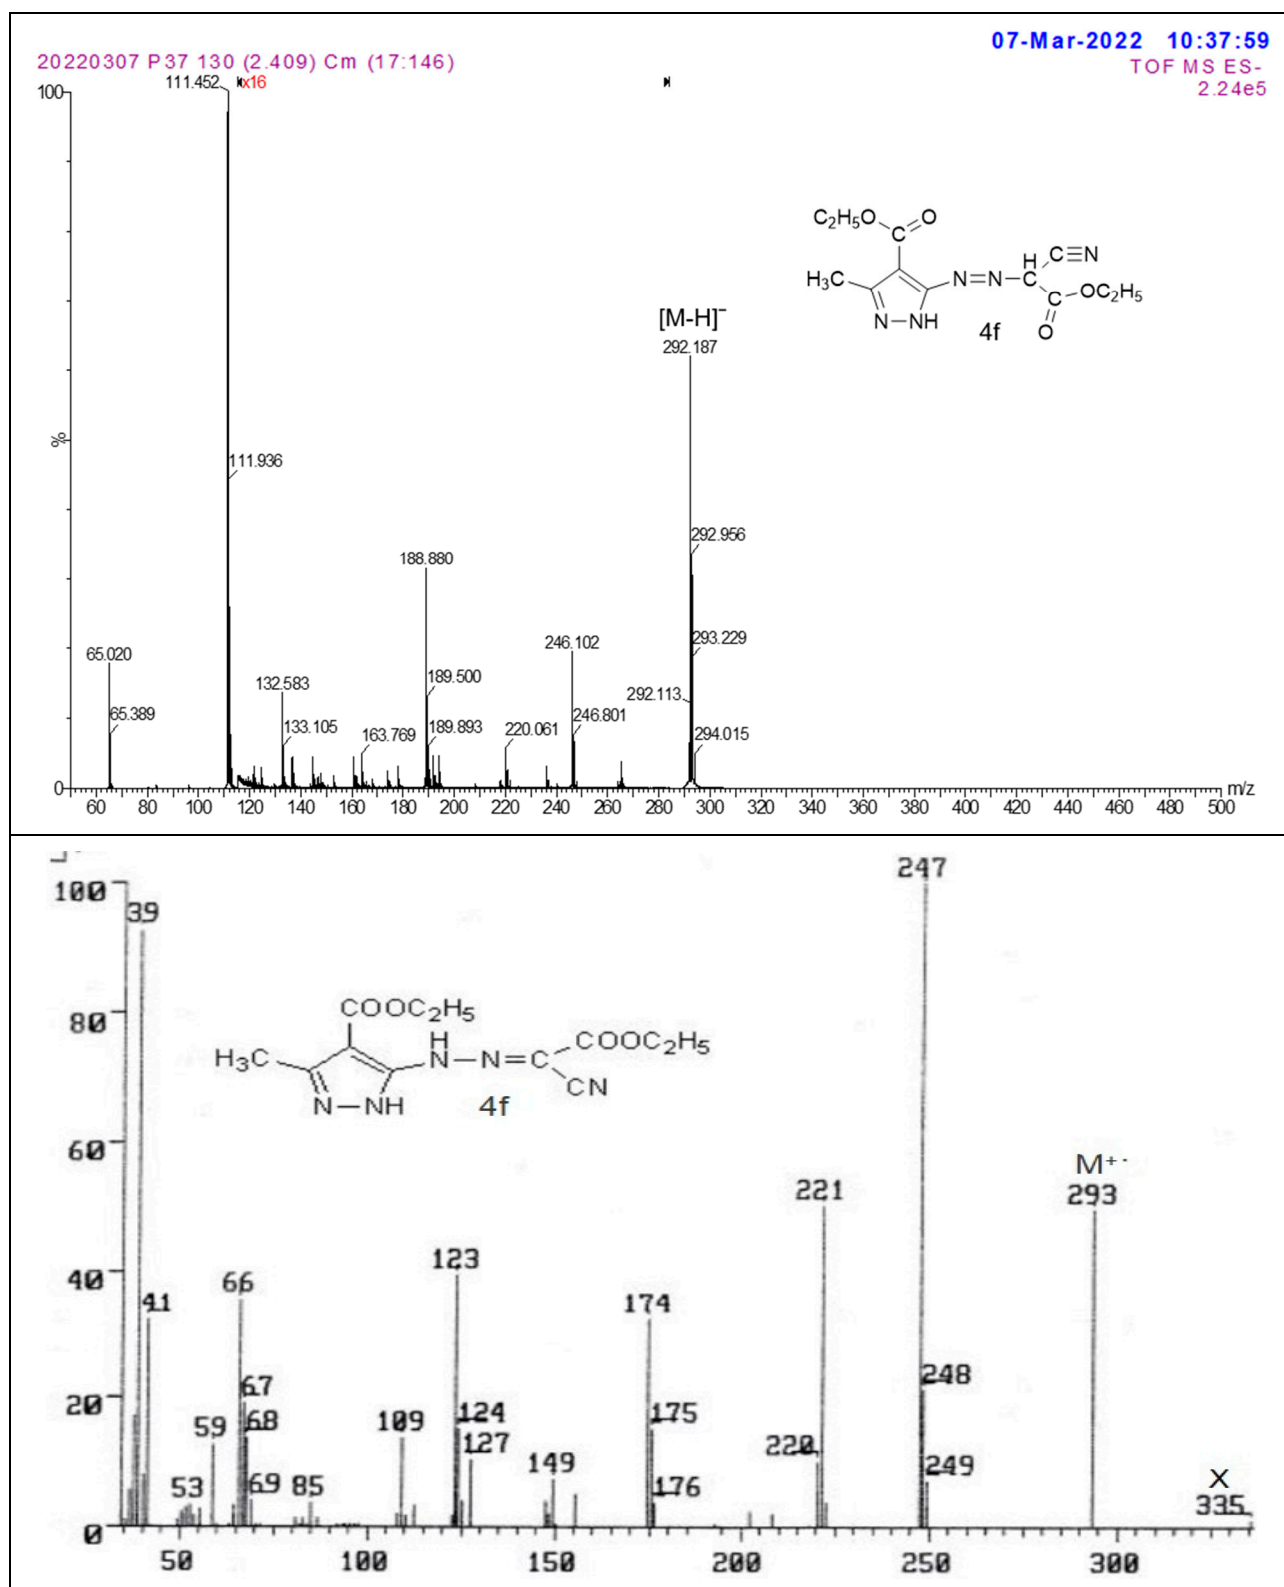

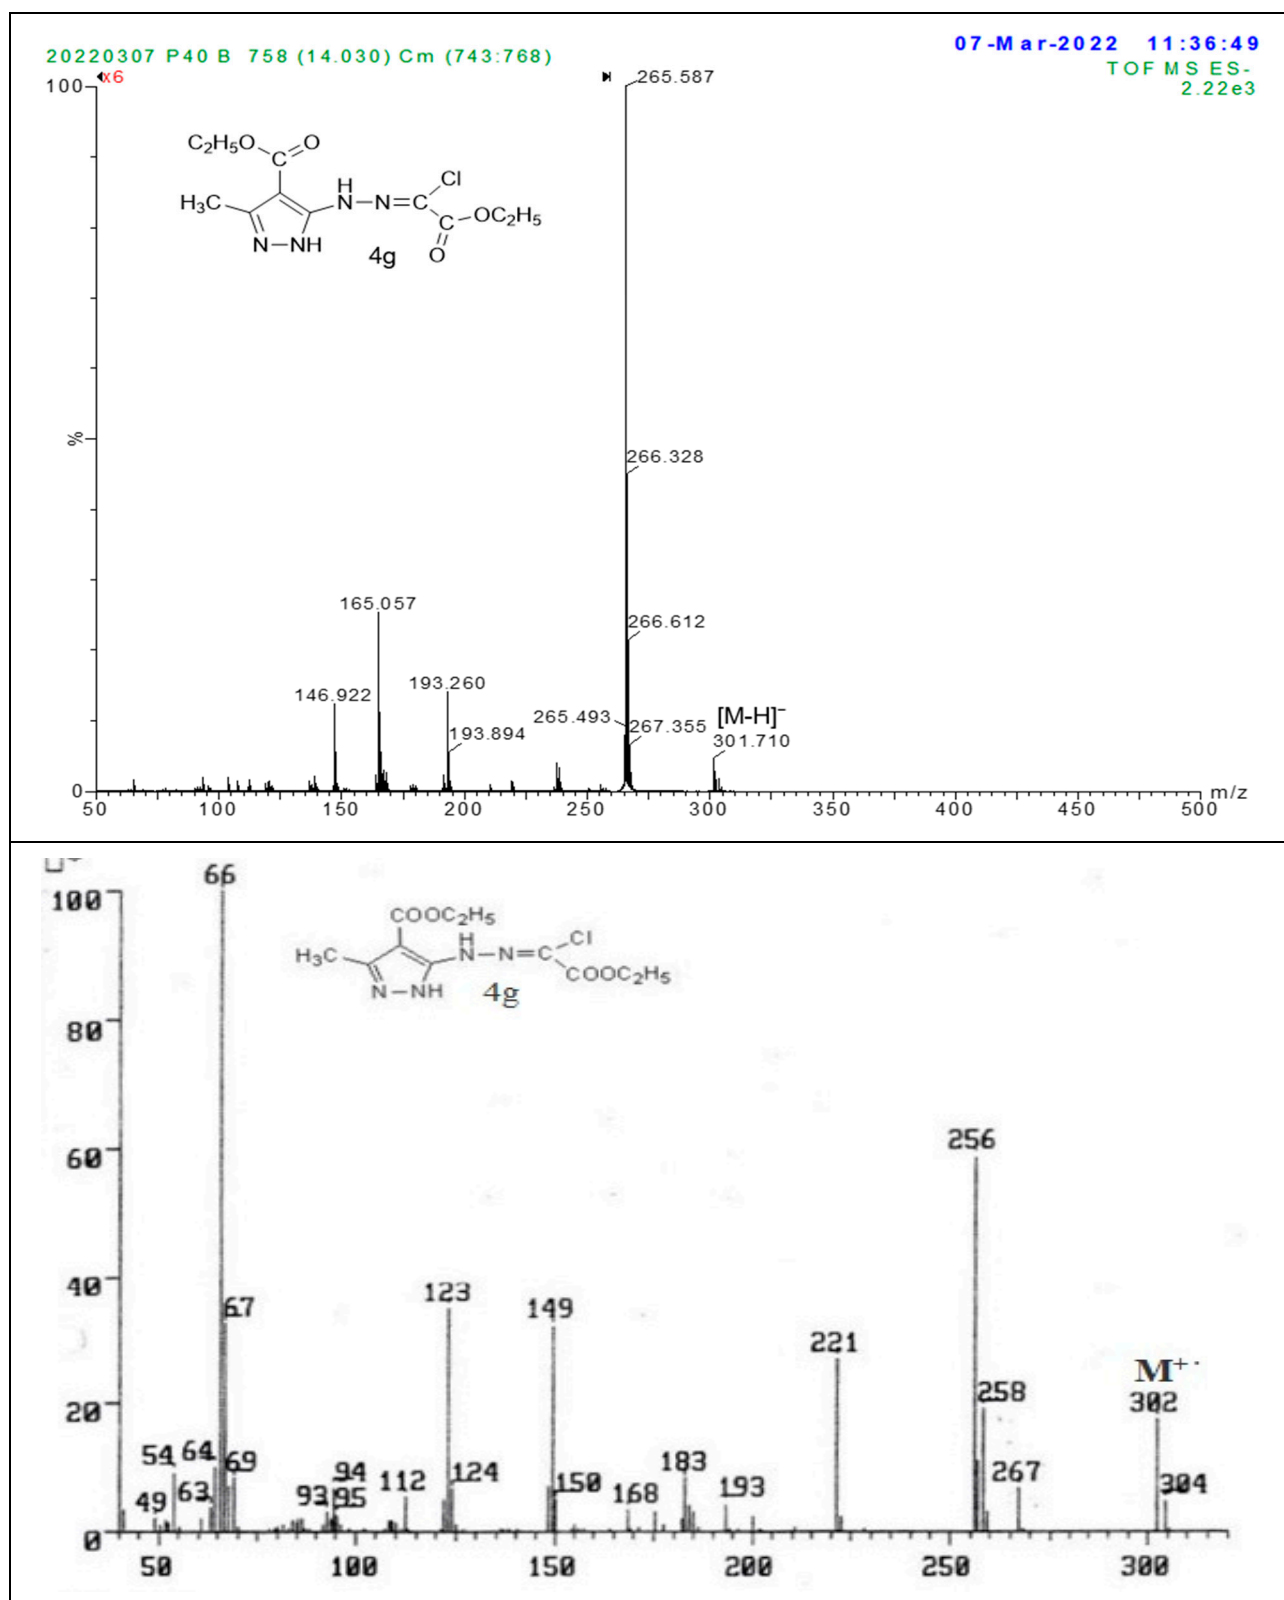

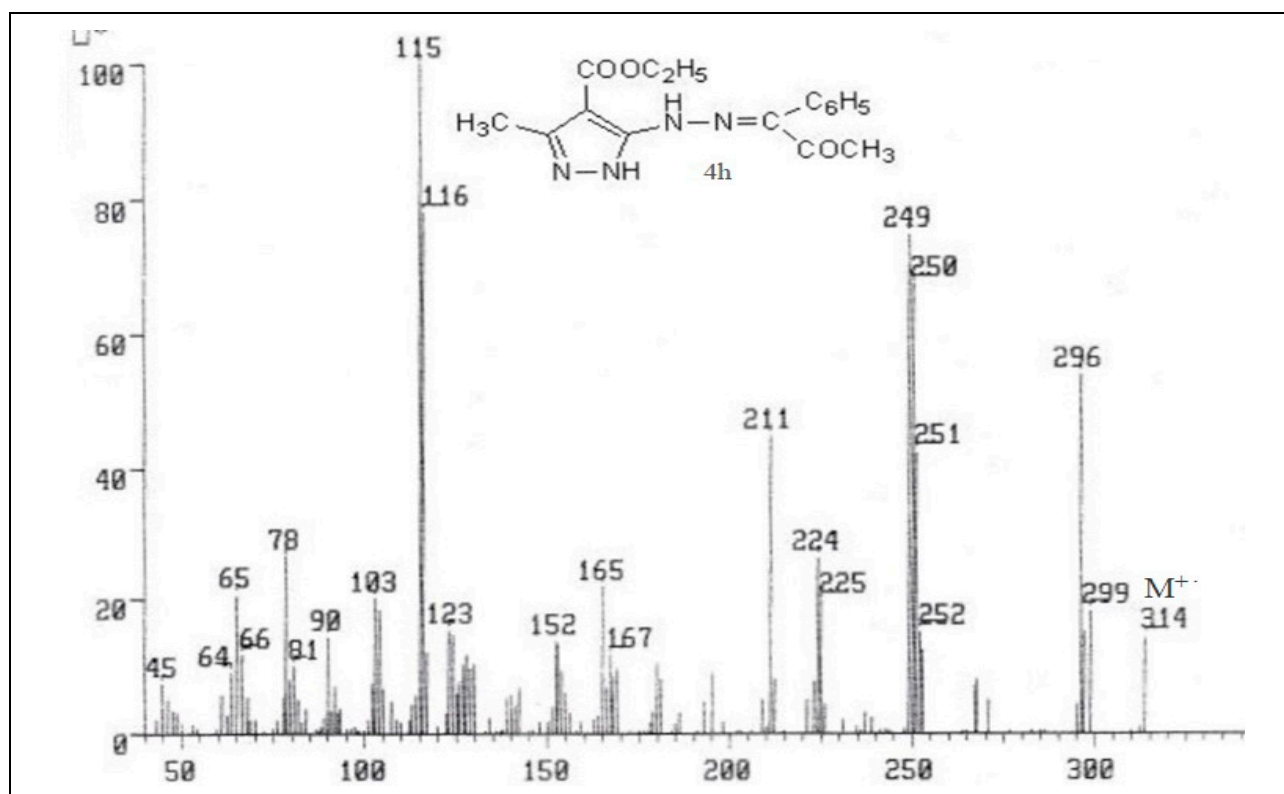

**Table S7.** Experimental FT-IR spectra (in the range/domain 4000 - 400 cm<sup>-1</sup>) of the azomethylene dyes.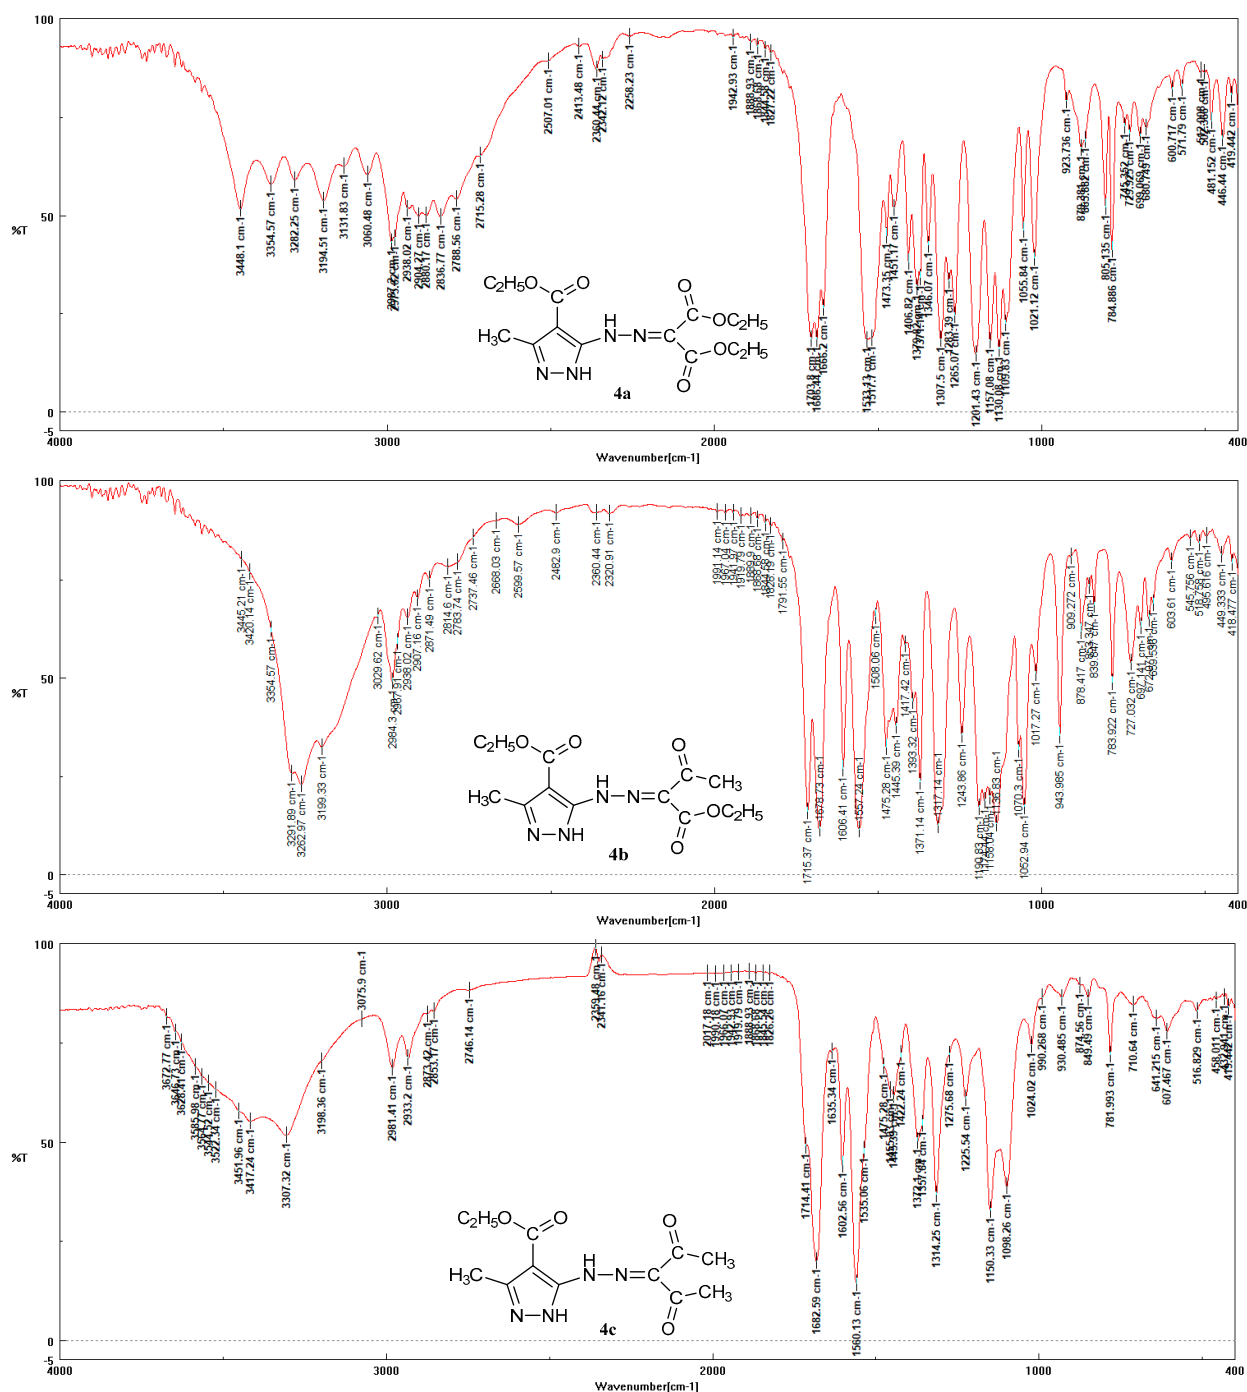

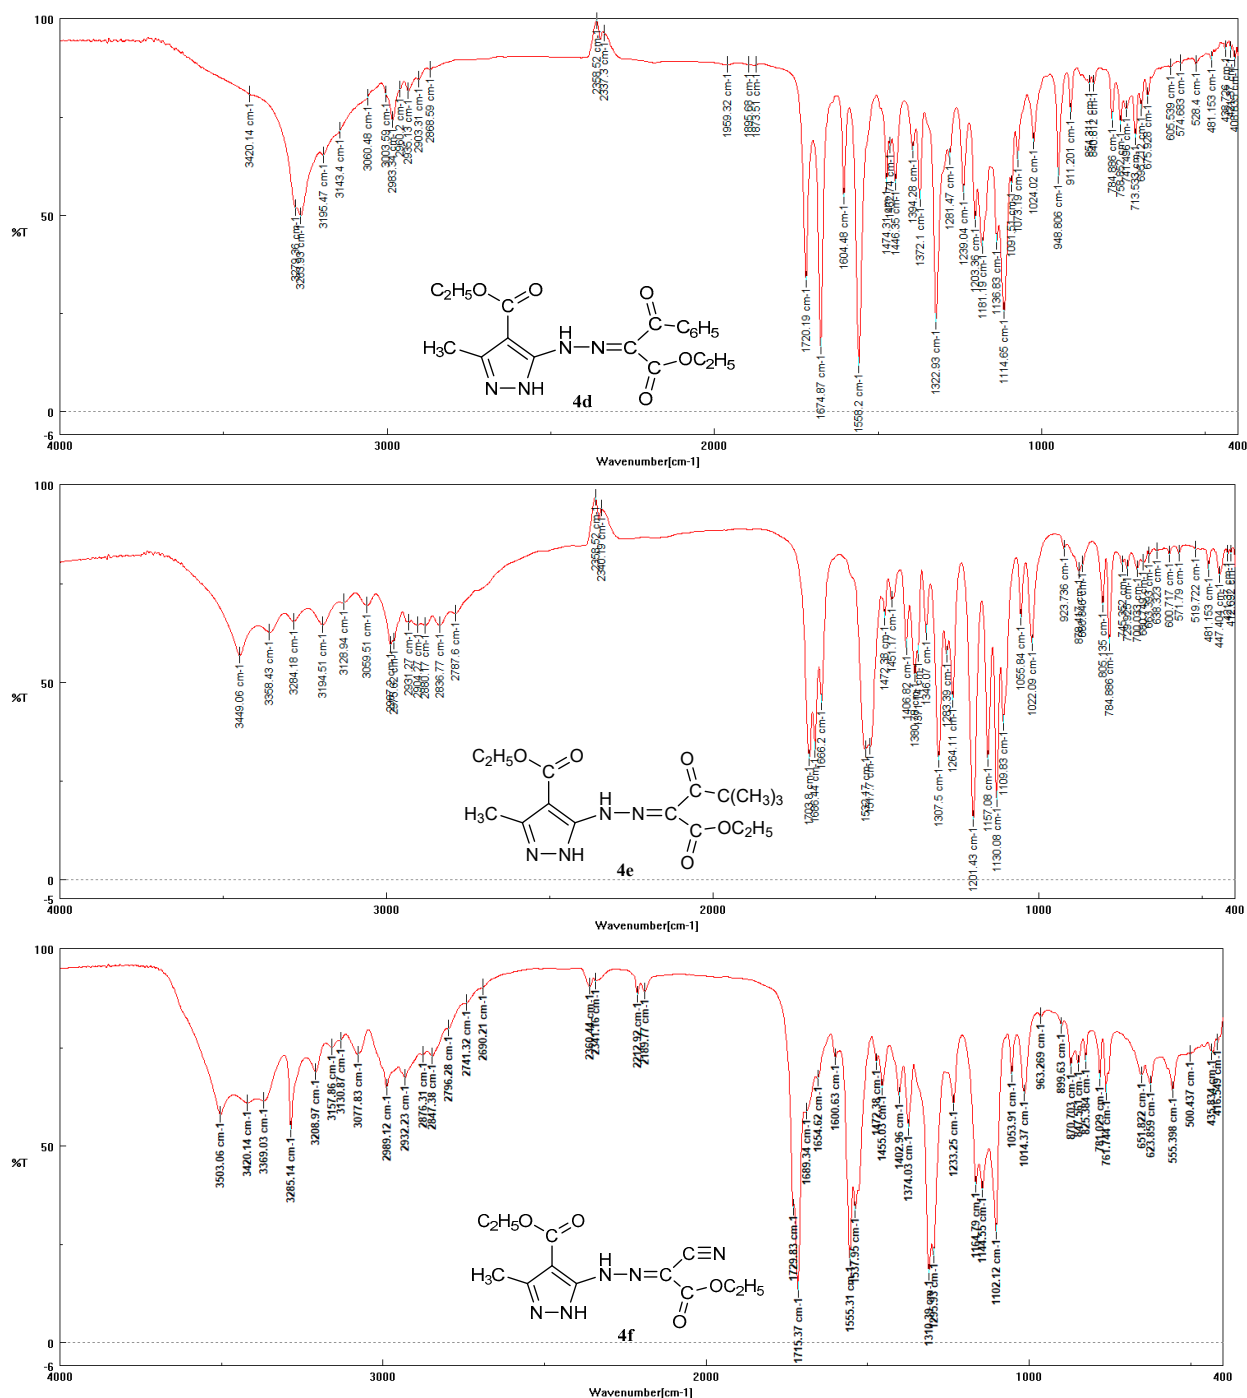

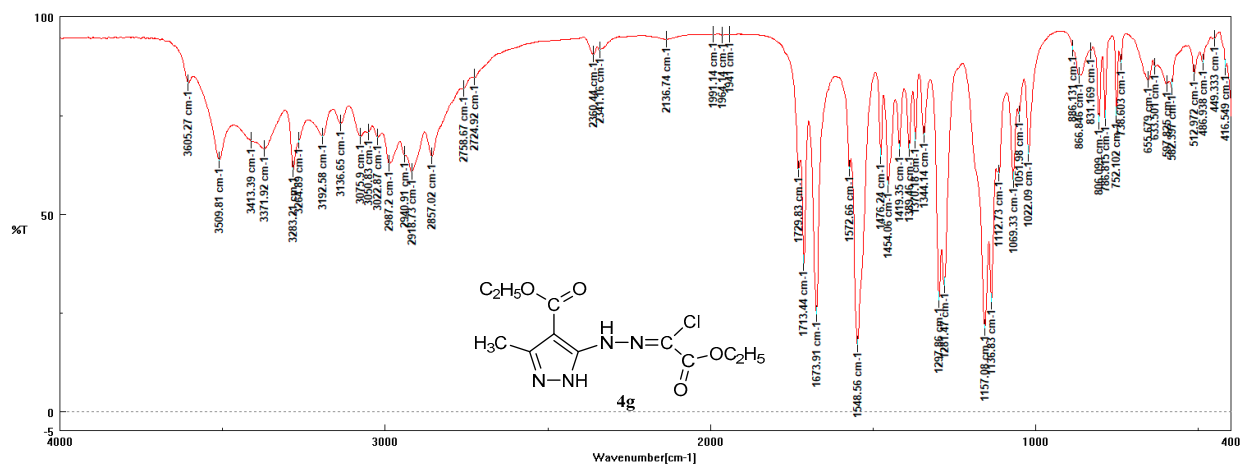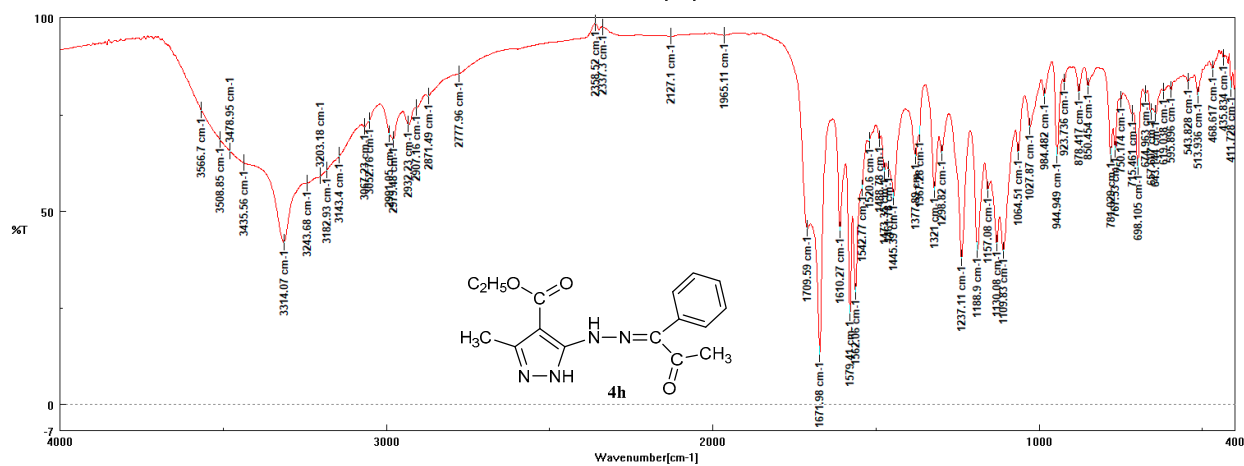

**Table S8.** Experimental FT-IR spectra (extended in the range/domain 3600 - 2500 and 2500 - 400 cm<sup>-1</sup>) of the azomethylene dyes.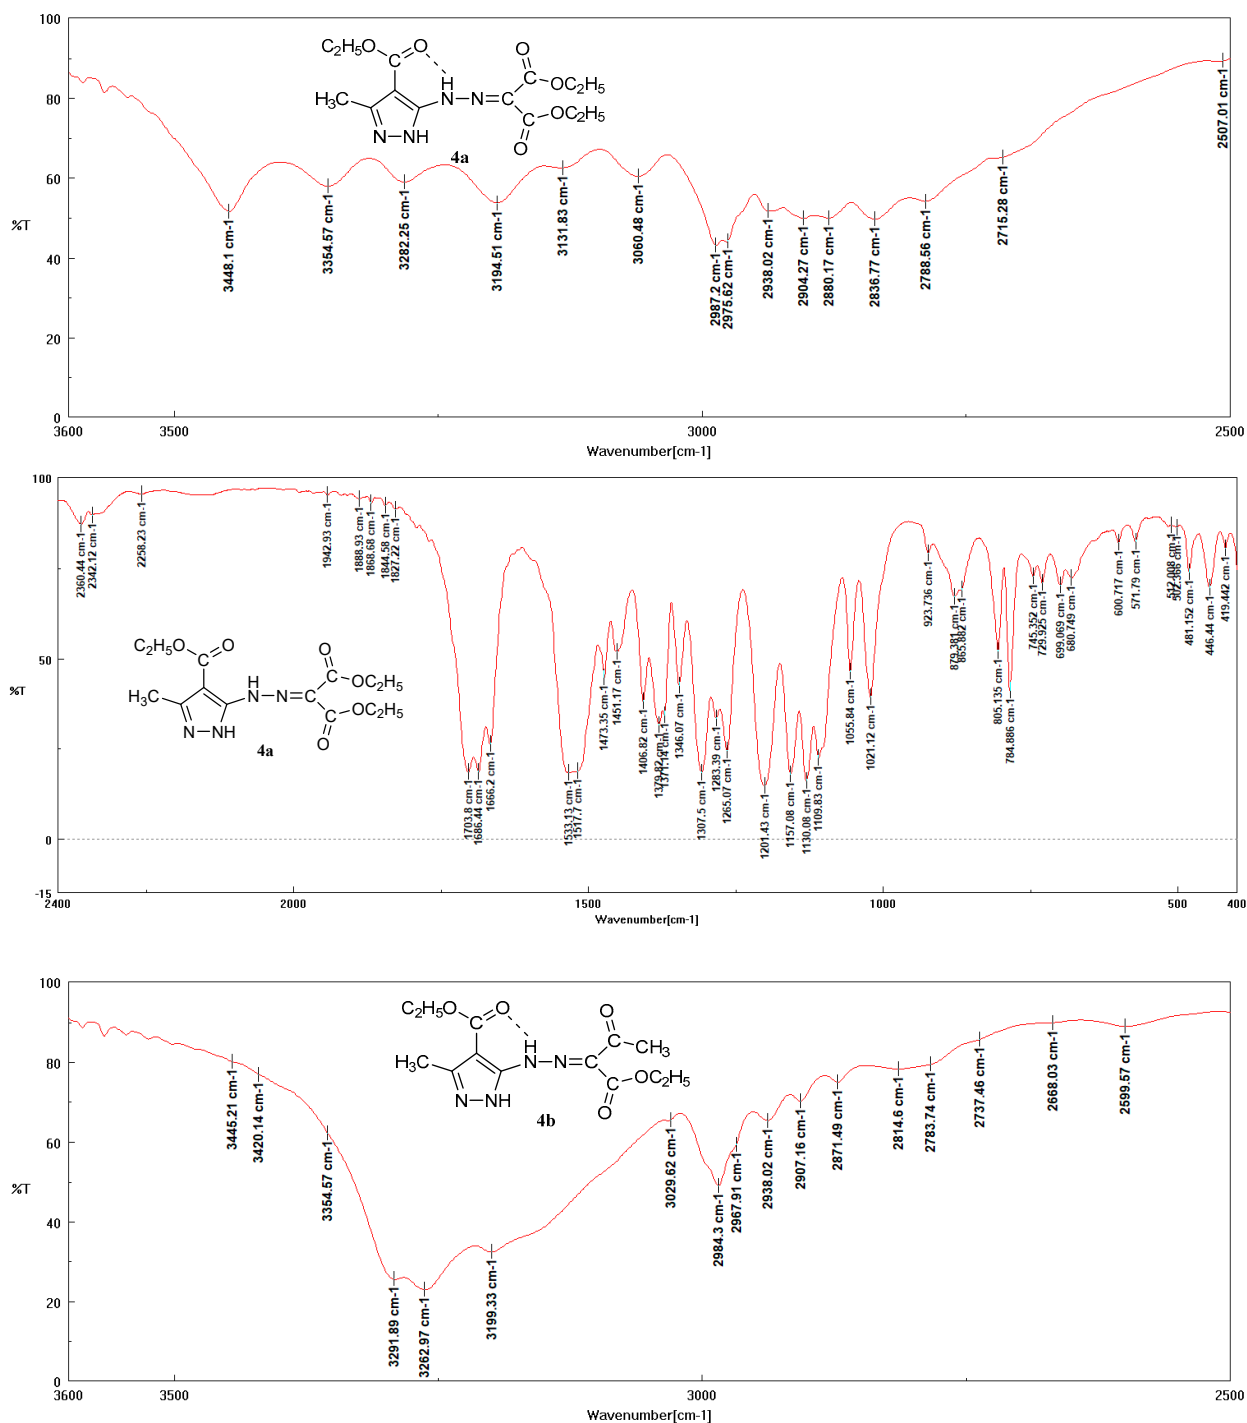



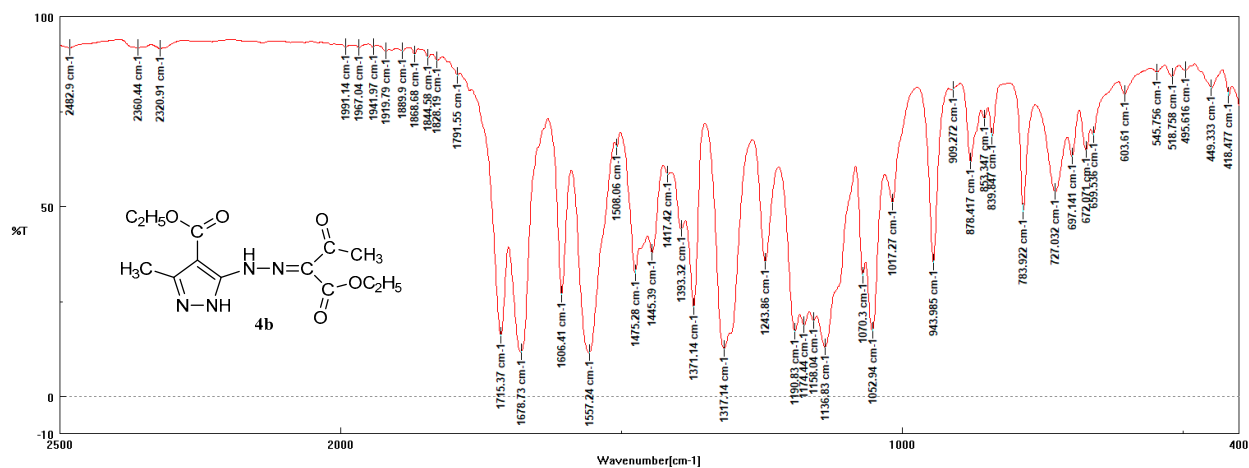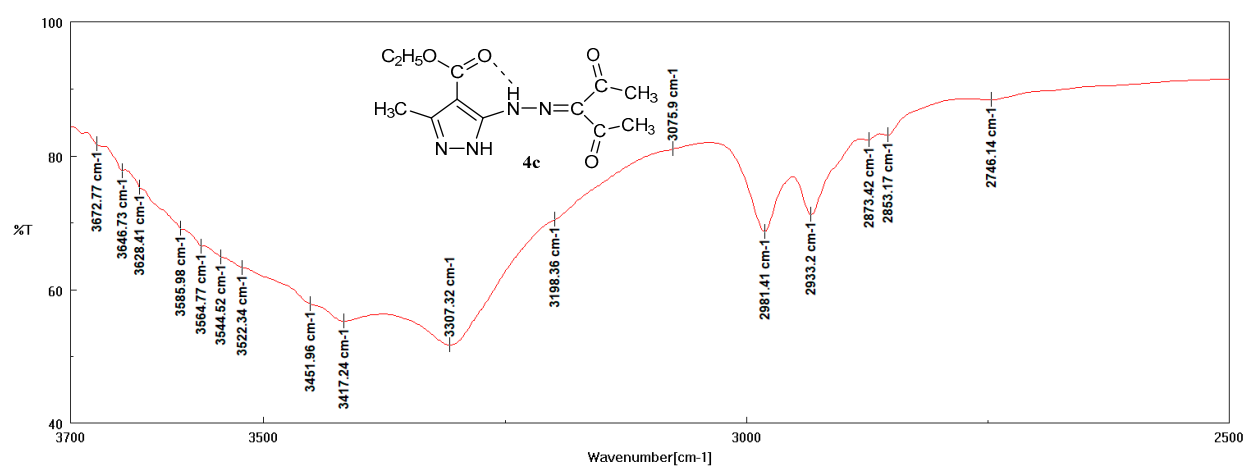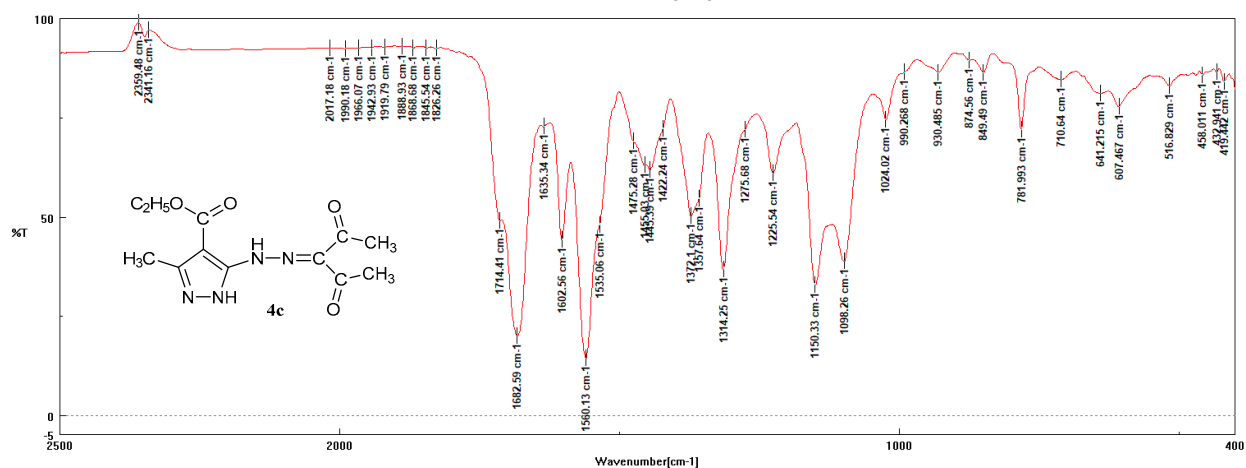

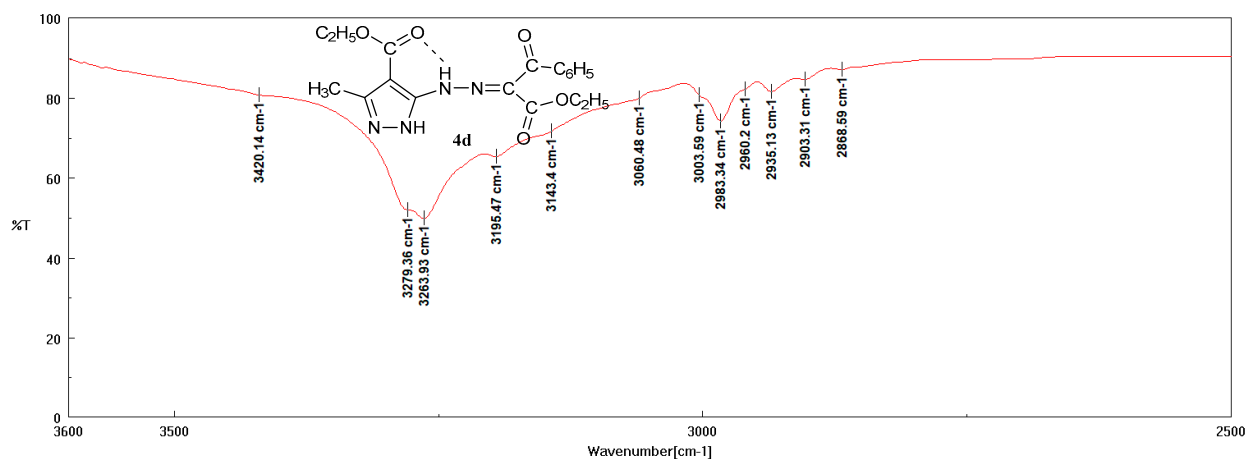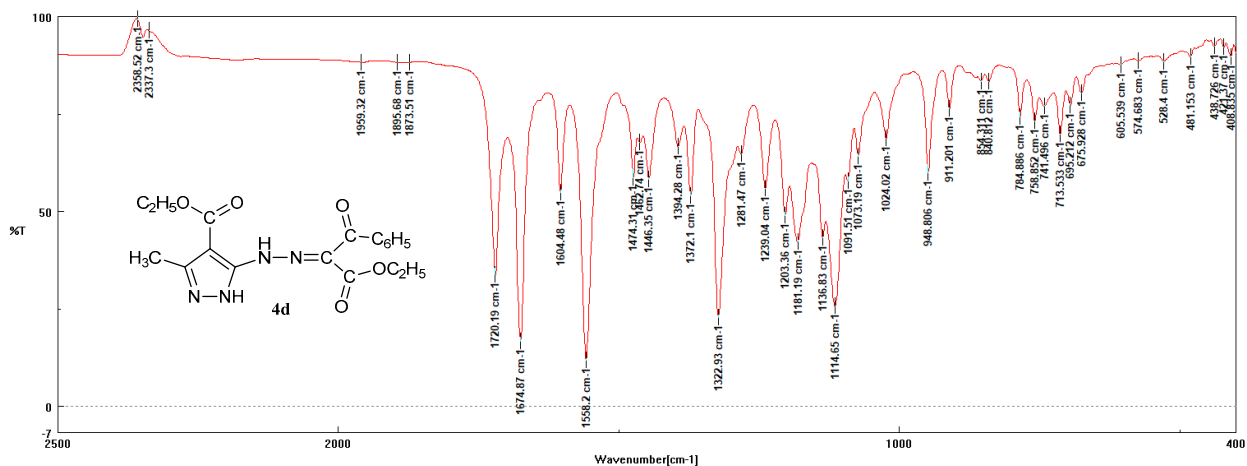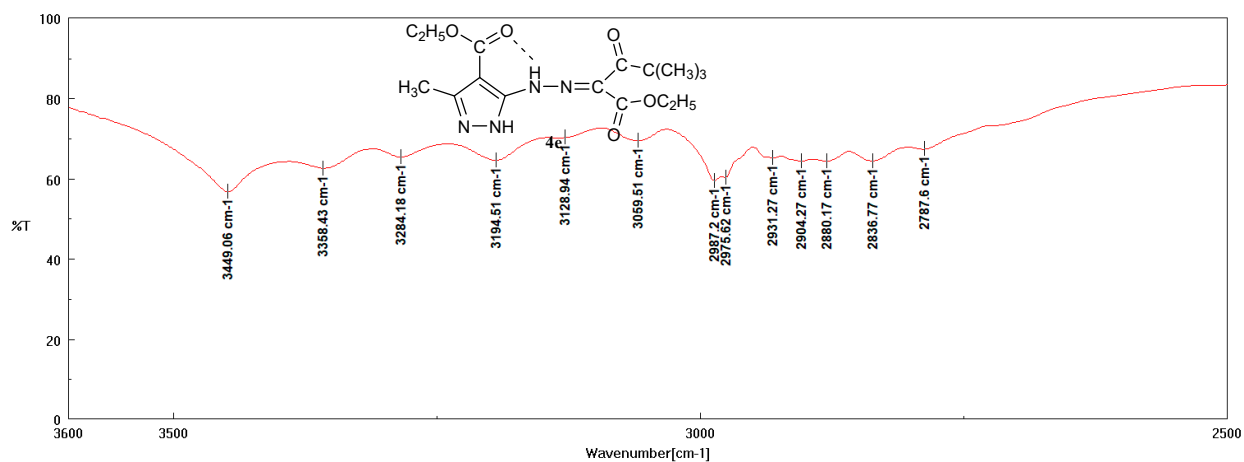

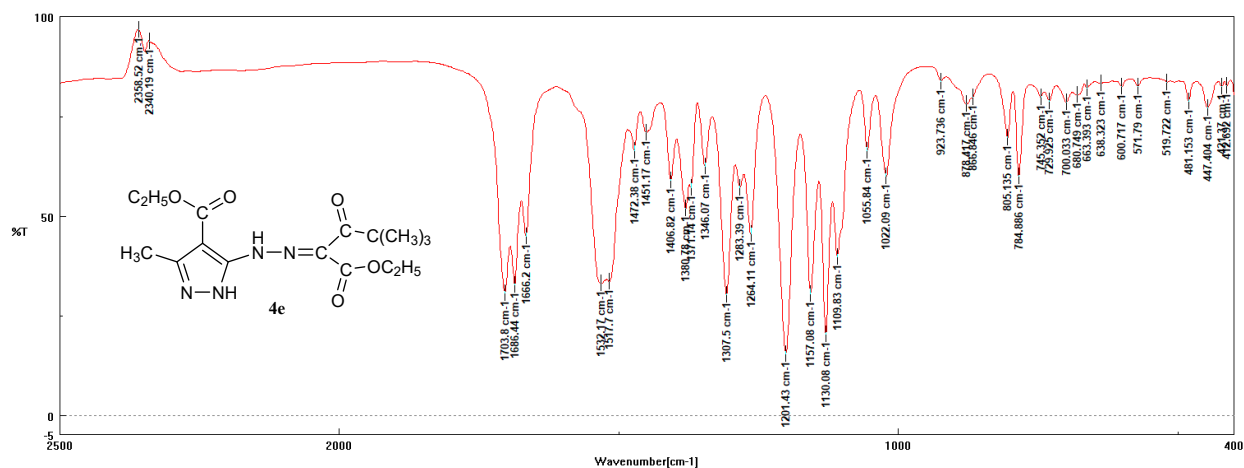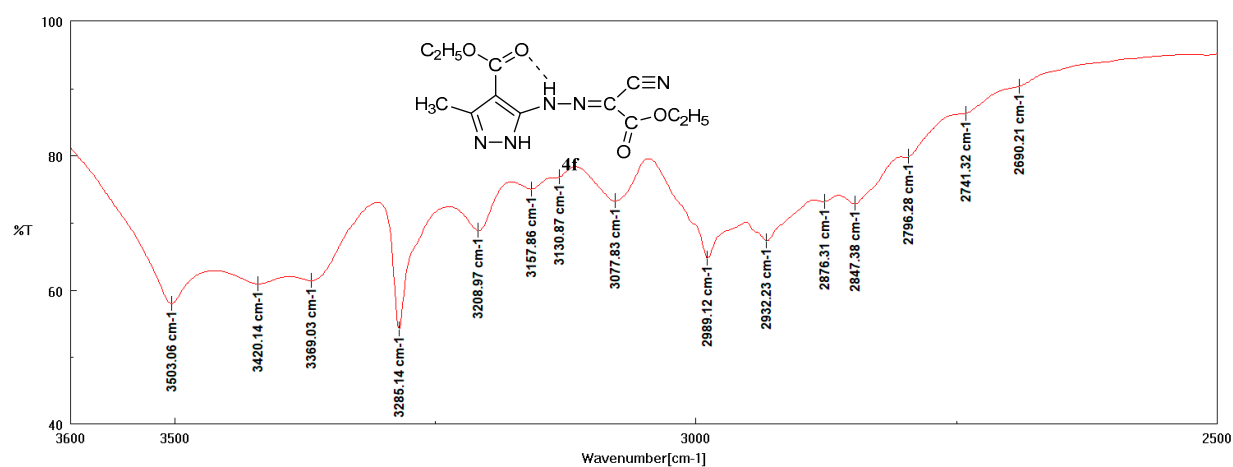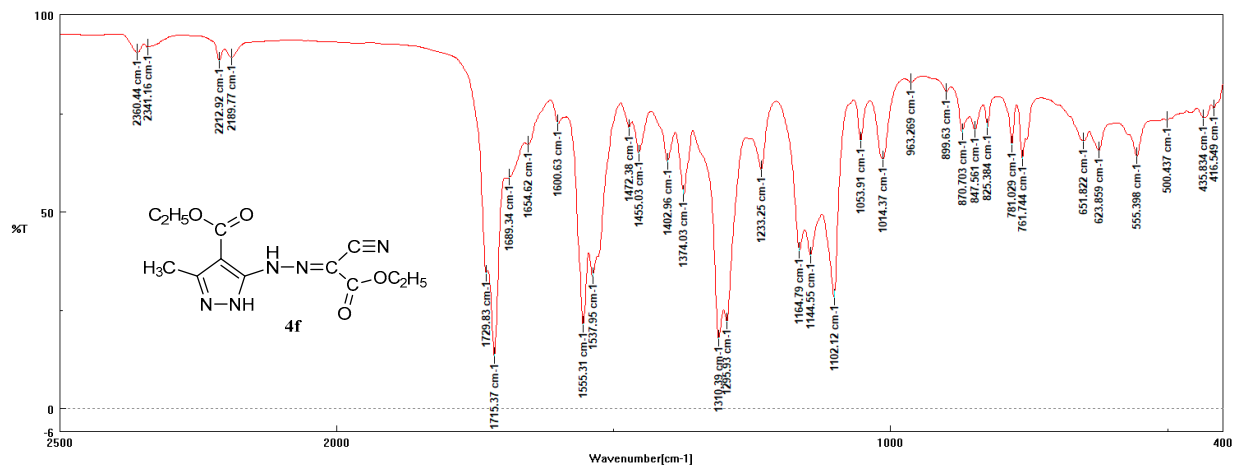

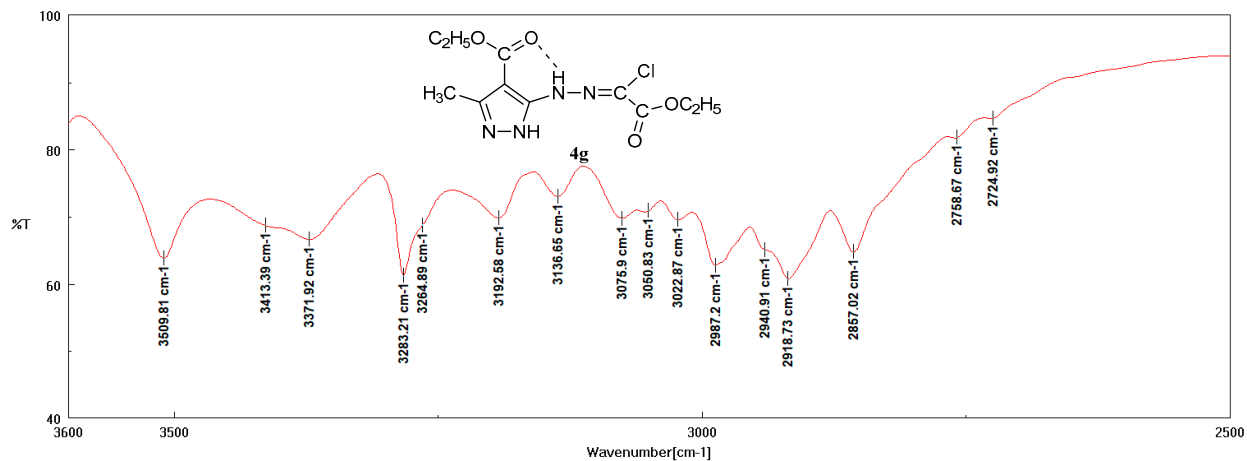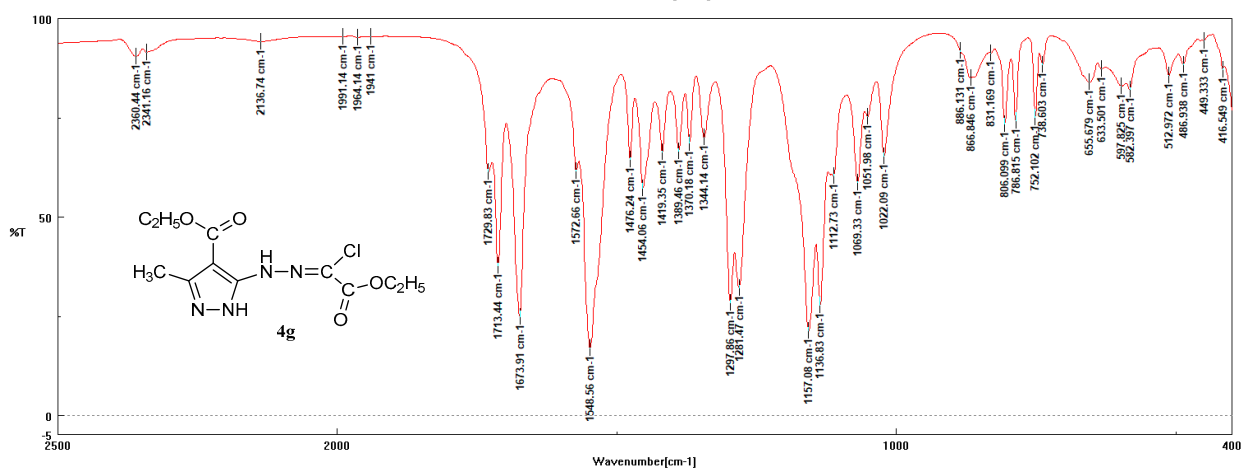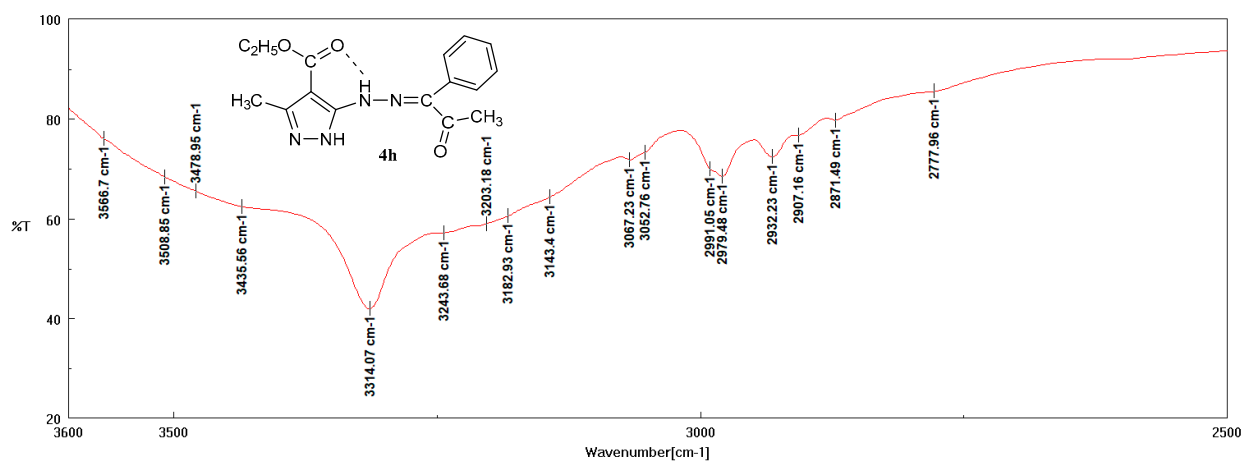

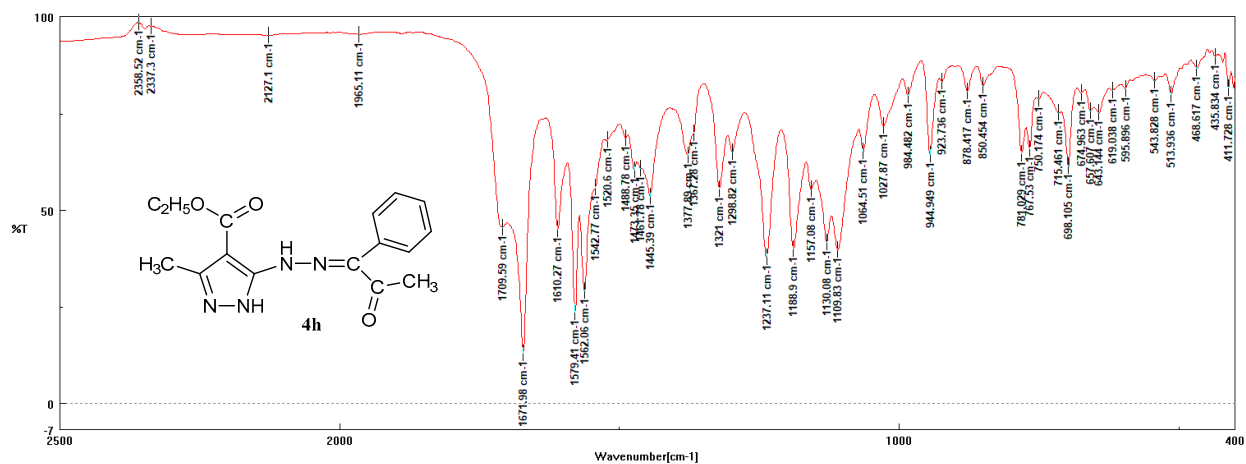

**Table S9.** Calculated bioconcentration factor (BCF), oral rodent toxicity (LD<sub>50</sub>) with toxicity classes and other endpoint toxicities (their probability is included in parenthesis) for the new azomethylene dyes.

| Dye | Tautomer | BCF*<br>(L/kg wet-wt) | LD <sub>50</sub> **<br>(mg/kg) | Toxicity<br>class | Hepatotoxicity<br>(Probability) | Carcinogenicity<br>(Probability) | Immunotoxicity<br>(Probability) | Mutagenicity<br>(Probability) | Cytotoxicity<br>(Probability) |
|-----|----------|-----------------------|--------------------------------|-------------------|---------------------------------|----------------------------------|---------------------------------|-------------------------------|-------------------------------|
| 4a1 | azo      | 10                    | 500                            | 4                 | Inactive (0.54)                 | Inactive (0.53)                  | Inactive (0.99)                 | Inactive (0.51)               | Inactive (0.74)               |
| 4a2 | hydrazo  | 2.716                 | 300                            | 4                 | Inactive (0.53)                 | Inactive (0.53)                  | Inactive (0.99)                 | Inactive (0.57)               | Inactive (0.71)               |
| 4b1 | azo      | 10                    | 500                            | 4                 | Inactive (0.52)                 | Inactive (0.55)                  | Inactive (0.99)                 | Inactive (0.5)                | Inactive (0.75)               |
| 4b2 | hydrazo  | 3.162                 | 200                            | 4                 | Inactive (0.51)                 | Inactive (0.54)                  | Inactive (0.99)                 | Inactive (0.56)               | Inactive (0.72)               |
| 4c1 | azo      | 10                    | 500                            | 4                 | Inactive (0.52)                 | Inactive (0.55)                  | Inactive (0.99)                 | Active (0.51)                 | Inactive (0.76)               |
| 4c2 | hydrazo  | 3.162                 | 150                            | 3                 | Inactive (0.51)                 | Inactive (0.54)                  | Inactive (0.99)                 | Inactive (0.54)               | Inactive (0.74)               |
| 4d1 | azo      | 2.6                   | 500                            | 4                 | Active (0.5)                    | Inactive (0.55)                  | Inactive (0.99)                 | Inactive (0.52)               | Inactive (0.78)               |
| 4d2 | hydrazo  | 9.288                 | 200                            | 3                 | Active (0.51)                   | Inactive (0.55)                  | Inactive (0.99)                 | Inactive (0.59)               | Inactive (0.76)               |
| 4e1 | azo      | 10                    | 500                            | 4                 | Inactive (0.51)                 | Inactive (0.56)                  | Inactive (0.99)                 | Inactive (0.51)               | Inactive (0.72)               |
| 4e2 | hydrazo  | 4.05                  | 150                            | 3                 | Inactive (0.51)                 | Inactive (0.55)                  | Inactive (0.99)                 | Inactive (0.55)               | Inactive (0.7)                |
| 4f1 | azo      | 10                    | 500                            | 4                 | Inactive (0.55)                 | Inactive (0.54)                  | Inactive (0.99)                 | Inactive (0.51)               | Inactive (0.72)               |
| 4f2 | hydrazo  | 14.2                  | 300                            | 3                 | Inactive (0.54)                 | Inactive (0.53)                  | Inactive (0.99)                 | Inactive (0.56)               | Inactive (0.69)               |
| 4g1 | azo      | 10                    | 500                            | 4                 | Inactive (0.53)                 | Inactive (0.58)                  | Inactive (0.99)                 | Inactive (0.53)               | Inactive (0.72)               |
| 4g2 | hydrazo  | 3.807                 | 300                            | 3                 | Inactive (0.53)                 | Inactive (0.57)                  | Inactive (0.99)                 | Inactive (0.57)               | Inactive (0.69)               |
| 4h1 | azo      | 10                    | 500                            | 4                 | Inactive (0.52)                 | Inactive (0.53)                  | Inactive (0.99)                 | Active (0.5)                  | Inactive (0.77)               |
| 4h2 | hydrazo  | 16.43                 | 1000                           | 4                 | Inactive (0.51)                 | Inactive (0.53)                  | Inactive (0.99)                 | Inactive (0.55)               | Inactive (0.75)               |

\* BCF > 5000 corresponds to high bioconcentration potential; 1000 < BCF < 5000 – moderate bioconcentration potential; BCF < 1000 – low bioconcentration potential. \*\* LD<sub>50</sub> ≤ 5 (Class I, fatal if swallowed); 5 < LD<sub>50</sub> ≤ 50 (Class II, fatal if swallowed); 50 < LD<sub>50</sub> ≤ 300 (Class III, toxic if swallowed); 300 < LD<sub>50</sub> ≤ 2000 (Class IV, harmful if swallowed); 2000 < LD<sub>50</sub> ≤ 5000 (Class V, may be harmful if swallowed); LD<sub>50</sub> > 5000 (Class VI, non-toxic).

## Reference

1. Pedretti, A.; Mazzolari, A.; Gervasoni, S.; Fumagalli, L.; Vistoli, G. The VEGA suite of programs: A versatile platform for cheminformatics and drug design projects. *Bioinformatics* **2021**, *37*, 1174–1175.
